# Supplementary material for: Group 7 carbonyl complexes of a PNN-heteroscorpionate ligand
Source: Royal Society of Chemistry journal article supplement (doi:10.1039/d4ra05287k), 2024-01-01
Supplement: d4ra05287k2.pdf [file d4ra05287k2.pdf]

Supporting Information for:

## Group 7 Carbonyl Complexes of a PNN-Heteroscorpionate Ligand

Jorge P. Valdivieso III<sup>a</sup>, Alexander N. Erickson, and James R. Gardinier\*<sup>a</sup>

### Table of Contents:

|                                                                                                                        |     |
|------------------------------------------------------------------------------------------------------------------------|-----|
| Crystal data and structure refinement tables                                                                           | S2  |
| Structures of Manganese complexes                                                                                      | S4  |
| Possible Isomers of ([pzzTTP)Re(CO) <sub>3</sub> Br]                                                                   | S5  |
| <sup>1</sup> H and <sup>31</sup> P NMR of <b>1</b> in CD <sub>3</sub> CN                                               | S6  |
| <sup>1</sup> H and <sup>31</sup> P NMR of <b>1</b> in CD <sub>2</sub> Cl <sub>2</sub>                                  | S7  |
| PXRD of as-formed <b>1</b> before crystallization                                                                      | S8  |
| <sup>1</sup> H, <sup>13</sup> C, and <sup>31</sup> P NMR spectra <b>2-Re</b> , <b>2-Mn</b> , <b>3-Re</b> , <b>3-Mn</b> | S9  |
| Thermal conversion <b>2-Mn</b> to <b>3-Mn</b>                                                                          | S13 |
| <sup>1</sup> H NMR spectrum of <b>2-Re</b> at different concentrations                                                 | S14 |
| IR spectra                                                                                                             | S15 |
| Electronic Absorption Spectrum of CH <sub>3</sub> CN solutions of <b>2-Re</b> and <b>3-Re</b>                          | S17 |
| Cyclic voltammograms                                                                                                   | S17 |
| Powder X-ray diffractogram of product after photoirradiation of <b>2-Mn</b>                                            | S18 |
| Summary of DFT data Table                                                                                              | S20 |
| Calculated IR data                                                                                                     | S21 |
| Calculated redox potentials                                                                                            | S23 |
| Frontier orbitals                                                                                                      | S24 |
| Tabulated TD-DFT Data                                                                                                  | S27 |
| Electron density difference plots for first excited states                                                             | S32 |
| Plot of <sup>31</sup> P NMR chemical shift versus Mulliken Charge                                                      | S32 |

**Table S1.** Crystal data and structure refinement of rhenium compounds.

| Identification code                         | <b>1</b>                                                            | <b>2-Re</b>                                                                       | <b>3-Re</b>                                                                       |
|---------------------------------------------|---------------------------------------------------------------------|-----------------------------------------------------------------------------------|-----------------------------------------------------------------------------------|
| CCDC #                                      | 2371547                                                             | 2371549                                                                           | 2371551                                                                           |
| Empirical formula                           | C <sub>30</sub> H <sub>25</sub> N <sub>4</sub> O <sub>3</sub> PBrRe | C <sub>31</sub> H <sub>25</sub> N <sub>4</sub> O <sub>6</sub> F <sub>3</sub> PSRe | C <sub>32</sub> H <sub>28</sub> F <sub>3</sub> N <sub>5</sub> O <sub>5</sub> PReS |
| Formula weight                              | 786.62                                                              | 855.78                                                                            | 868.82                                                                            |
| Temperature/K                               | 100.00(10)                                                          | 100.00(10)                                                                        | 100.00(10)                                                                        |
| Crystal system                              | monoclinic                                                          | triclinic                                                                         | monoclinic                                                                        |
| Space group                                 | P2 <sub>1</sub> /n                                                  | P-1                                                                               | P2 <sub>1</sub> /n                                                                |
| a/Å                                         | 12.3314(2)                                                          | 8.9587(3)                                                                         | 16.6364(3)                                                                        |
| b/Å                                         | 13.5371(2)                                                          | 12.2629(4)                                                                        | 12.9137(2)                                                                        |
| c/Å                                         | 17.3610(3)                                                          | 14.9571(5)                                                                        | 16.6780(3)                                                                        |
| α/°                                         | 90                                                                  | 99.615(2)                                                                         | 90                                                                                |
| β/°                                         | 102.9290(10)                                                        | 90.746(2)                                                                         | 111.962(2)                                                                        |
| γ/°                                         | 90                                                                  | 94.564(2)                                                                         | 90                                                                                |
| Volume/Å <sup>3</sup>                       | 2824.62(8)                                                          | 1614.38(9)                                                                        | 3323.04(11)                                                                       |
| Z                                           | 4                                                                   | 2                                                                                 | 4                                                                                 |
| ρ <sub>calc</sub> /cm <sup>3</sup>          | 1.850                                                               | 1.760                                                                             | 1.737                                                                             |
| μ/mm <sup>-1</sup>                          | 10.932                                                              | 9.027                                                                             | 8.766                                                                             |
| F(000)                                      | 1528.0                                                              | 840.0                                                                             | 1712.0                                                                            |
| Crystal size/mm <sup>3</sup>                | 0.321 × 0.2 × 0.12                                                  | 0.102×0.061×0.033                                                                 | 0.384 × 0.272 × 0.056                                                             |
| Cu Kα (λ)                                   | 1.54184                                                             | 1.54184                                                                           | 1.54184                                                                           |
| 2θ range                                    | 8.014 to 141.296                                                    | 7.336 to 141.244                                                                  | 8.92 to 141.214                                                                   |
| Index ranges                                | -14 ≤ h ≤ 15,<br>-16 ≤ k ≤ 16,<br>-21 ≤ l ≤ 20                      | -10 ≤ h ≤ 10,<br>-14 ≤ k ≤ 14,<br>-18 ≤ l ≤ 18                                    | -20 ≤ h ≤ 19,<br>-14 ≤ k ≤ 15,<br>-19 ≤ l ≤ 20                                    |
| Reflections collected                       | 26425                                                               | 29459                                                                             | 30852                                                                             |
| Independent reflections                     | 5354 [R <sub>int</sub> = 0.0475,<br>R <sub>sigma</sub> = 0.0292]    | 6116 [R <sub>int</sub> = 0.0745,<br>R <sub>sigma</sub> = 0.0478]                  | 6303 [R <sub>int</sub> = 0.0698,<br>R <sub>sigma</sub> = 0.0434]                  |
| Data/restraints/parameters                  | 5354/0/380                                                          | 6116/0/426                                                                        | 6303/0/436                                                                        |
| Goodness-of-fit on F <sup>2</sup>           | 1.138                                                               | 1.034                                                                             | 1.052                                                                             |
| Final R indexes [I ≥ 2σ (I)]                | R <sub>1</sub> = 0.0302, wR <sub>2</sub> = 0.0719                   | R <sub>1</sub> = 0.0349, wR <sub>2</sub> = 0.0856                                 | R <sub>1</sub> = 0.0345, wR <sub>2</sub> = 0.0839                                 |
| Final R indexes [all data]                  | R <sub>1</sub> = 0.0337, wR <sub>2</sub> = 0.0737                   | R <sub>1</sub> = 0.0384, wR <sub>2</sub> = 0.0881                                 | R <sub>1</sub> = 0.0431, wR <sub>2</sub> = 0.0897                                 |
| Largest diff. peak/hole / e Å <sup>-3</sup> | 0.97/-1.07                                                          | 1.61/-1.29                                                                        | 2.00/-1.14                                                                        |

**Table S2.** Crystal data and structure refinement of manganese compounds.

| Identification code                         | <b>2-Mn</b>                                                                       | <b>3-Mn<sub>0.92</sub>·2-Mn<sub>0.08</sub></b>                                                   | <b>3-Mn<sub>0.84</sub>·2-Mn<sub>0.16</sub></b>                                                   | <b>4</b>                                                                                          |
|---------------------------------------------|-----------------------------------------------------------------------------------|--------------------------------------------------------------------------------------------------|--------------------------------------------------------------------------------------------------|---------------------------------------------------------------------------------------------------|
| CCDC #                                      | 2371550                                                                           | 2383876                                                                                          | 2371552                                                                                          | 2371553                                                                                           |
| Empirical formula                           | C <sub>31</sub> H <sub>25</sub> N <sub>4</sub> O <sub>6</sub> F <sub>3</sub> PSMn | C <sub>31.92</sub> H <sub>27.77</sub> F <sub>3</sub> MnN <sub>4.92</sub><br>O <sub>5.08</sub> PS | C <sub>31.84</sub> H <sub>27.51</sub> F <sub>3</sub> MnN <sub>4.84</sub><br>O <sub>5.16</sub> PS | C <sub>28</sub> H <sub>25</sub> F <sub>3</sub> Mn <sub>0.5</sub> N <sub>4</sub> O <sub>4</sub> PS |
| Formula weight                              | 724.52                                                                            | 736.57                                                                                           | 735.42                                                                                           | 629.02                                                                                            |
| Temperature/K                               | 100.00(10)                                                                        | 100(2)                                                                                           | 100.00(10)                                                                                       | 99.9(3)                                                                                           |
| Crystal system                              | monoclinic                                                                        | monoclinic                                                                                       | monoclinic                                                                                       | triclinic                                                                                         |
| Space group                                 | P2 <sub>1</sub> /c                                                                | P2 <sub>1</sub> /n                                                                               | P2 <sub>1</sub> /n                                                                               | P-1                                                                                               |
| a/Å                                         | 11.99461(14)                                                                      | 16.4795(2)                                                                                       | 16.4795(2)                                                                                       | 9.3815(3)                                                                                         |
| b/Å                                         | 14.01447(15)                                                                      | 12.8391(2)                                                                                       | 12.8391(2)                                                                                       | 12.9857(4)                                                                                        |
| c/Å                                         | 19.1860(2)                                                                        | 16.5133(3)                                                                                       | 16.5133(3)                                                                                       | 13.0750(5)                                                                                        |
| α/°                                         | 90                                                                                | 90                                                                                               | 90                                                                                               | 64.443(3)                                                                                         |
| β/°                                         | 96.0115(11)                                                                       | 111.4813(18)                                                                                     | 111.4813(18)                                                                                     | 85.597(3)                                                                                         |
| γ/°                                         | 90                                                                                | 90                                                                                               | 90                                                                                               | 88.991(3)                                                                                         |
| Volume/Å <sup>3</sup>                       | 3207.40(6)                                                                        | 3251.19(10)                                                                                      | 3251.19(10)                                                                                      | 1432.55(9)                                                                                        |
| Z                                           | 4                                                                                 | 4                                                                                                | 4                                                                                                | 2                                                                                                 |
| ρ <sub>calc</sub> /cm <sup>3</sup>          | 1.500                                                                             | 1.505                                                                                            | 1.502                                                                                            | 1.458                                                                                             |
| μ/mm <sup>-1</sup>                          | 5.021                                                                             | 4.949                                                                                            | 4.950                                                                                            | 3.781                                                                                             |
| F(000)                                      | 1480.0                                                                            | 1510                                                                                             | 1507.0                                                                                           | 647.0                                                                                             |
| Crystal size/mm <sup>3</sup>                | 0.41 × 0.201 × 0.139                                                              | 0.289 × 0.145 × 0.106                                                                            | 0.534 × 0.295 ×<br>0.028                                                                         | 0.148 × 0.095 × 0.06                                                                              |
| Cu Kα (λ)                                   | 1.54184                                                                           | 1.54184                                                                                          | 1.54184                                                                                          | 1.54184                                                                                           |
| 2θ range                                    | 7.41 to 141.22                                                                    | 6.482 to 161.666                                                                                 | 8.976 to 141.082                                                                                 | 7.516 to 141.074                                                                                  |
| Index ranges                                | -14 ≤ h ≤ 14,<br>-16 ≤ k ≤ 17,<br>-22 ≤ l ≤ 21                                    | -20 ≤ h ≤ 20,<br>-16 ≤ k ≤ 16,<br>-20 ≤ l ≤ 20                                                   | -19 ≤ h ≤ 20,<br>-15 ≤ k ≤ 15,<br>-19 ≤ l ≤ 20                                                   | -11 ≤ h ≤ 11,<br>-15 ≤ k ≤ 15,<br>-15 ≤ l ≤ 15                                                    |
| Reflections collected                       | 29938                                                                             | 151831                                                                                           | 30350                                                                                            | 26350                                                                                             |
| Independent reflections                     | 6088 [R <sub>int</sub> = 0.0356,<br>R <sub>sigma</sub> = 0.0238]                  | 7086 [R <sub>int</sub> = 0.0382]                                                                 | 6176 [R <sub>int</sub> = 0.0397,<br>R <sub>sigma</sub> = 0.0260]                                 | 5431 [R <sub>int</sub> = 0.0371,<br>R <sub>sigma</sub> = 0.0252]                                  |
| Data/restraints/parameters                  | 6088/0/427                                                                        | 7086 / 103 / 516                                                                                 | 6176/0/446                                                                                       | 5431/0/378                                                                                        |
| Goodness-of-fit on F <sup>2</sup>           | 1.046                                                                             | 1.044                                                                                            | 1.032                                                                                            | 1.042                                                                                             |
| Final R indexes [I ≥ 2σ (I)]                | R <sub>1</sub> = 0.0293,<br>wR <sub>2</sub> = 0.0742                              | R <sub>1</sub> = 0.0261,<br>wR <sub>2</sub> = 0.0693                                             | R <sub>1</sub> = 0.0347,<br>wR <sub>2</sub> = 0.0894                                             | R <sub>1</sub> = 0.0307,<br>wR <sub>2</sub> = 0.0785                                              |
| Final R indexes [all data]                  | R <sub>1</sub> = 0.0321,<br>wR <sub>2</sub> = 0.0761                              | R <sub>1</sub> = 0.0262,<br>wR <sub>2</sub> = 0.0694                                             | R <sub>1</sub> = 0.0383,<br>wR <sub>2</sub> = 0.0922                                             | R <sub>1</sub> = 0.0340,<br>wR <sub>2</sub> = 0.0815                                              |
| Largest diff. peak/hole / e Å <sup>-3</sup> | 0.41/-0.30                                                                        | 0.317/-0.382                                                                                     | 0.502/-0.397                                                                                     | 0.37/-0.35                                                                                        |

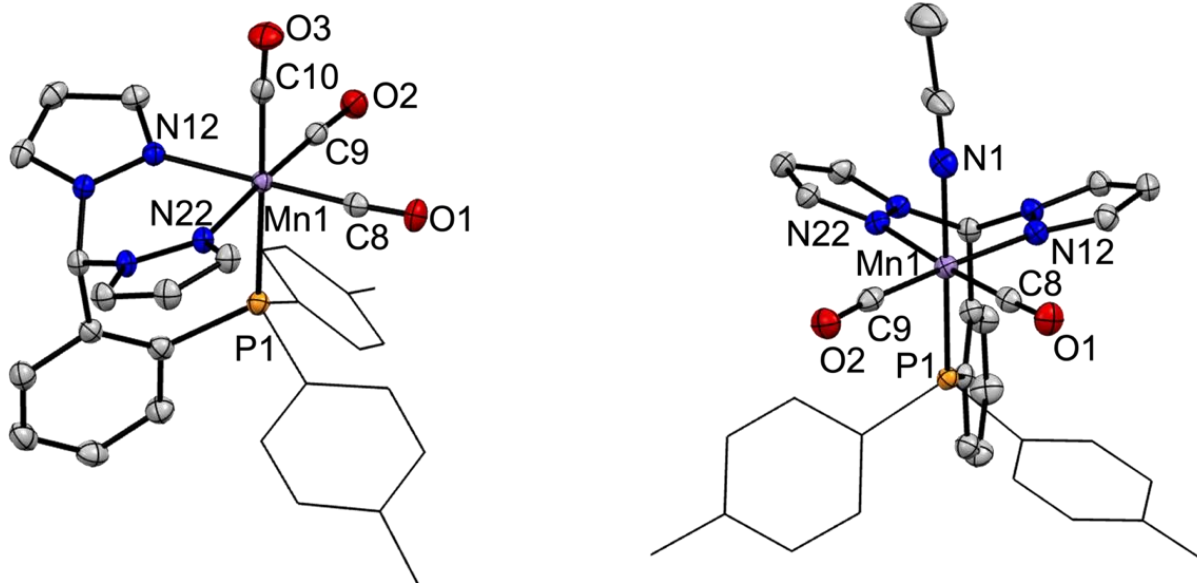

**Figure S1.** Structures of cations in **2-Mn** (left) and **3-Mn** (right). See Table 1 of main text for bond metrics. Thermal ellipsoids are drawn at the 50% probability level.

**Possible Isomers of [(pz<sub>2</sub>TTP)Re(CO)<sub>3</sub>Br], 1.** There are nine reasonable isomers (excluding enantiomerism) for monomeric **1** with six-coordinate rhenium, as illustrated for a truncated model in Figure S2. There is one ionic [*fac*-(κ<sup>3</sup>N<sub>2</sub>P-pz<sub>2</sub>TTP)Re(CO)<sub>3</sub>](Br) and eight molecular

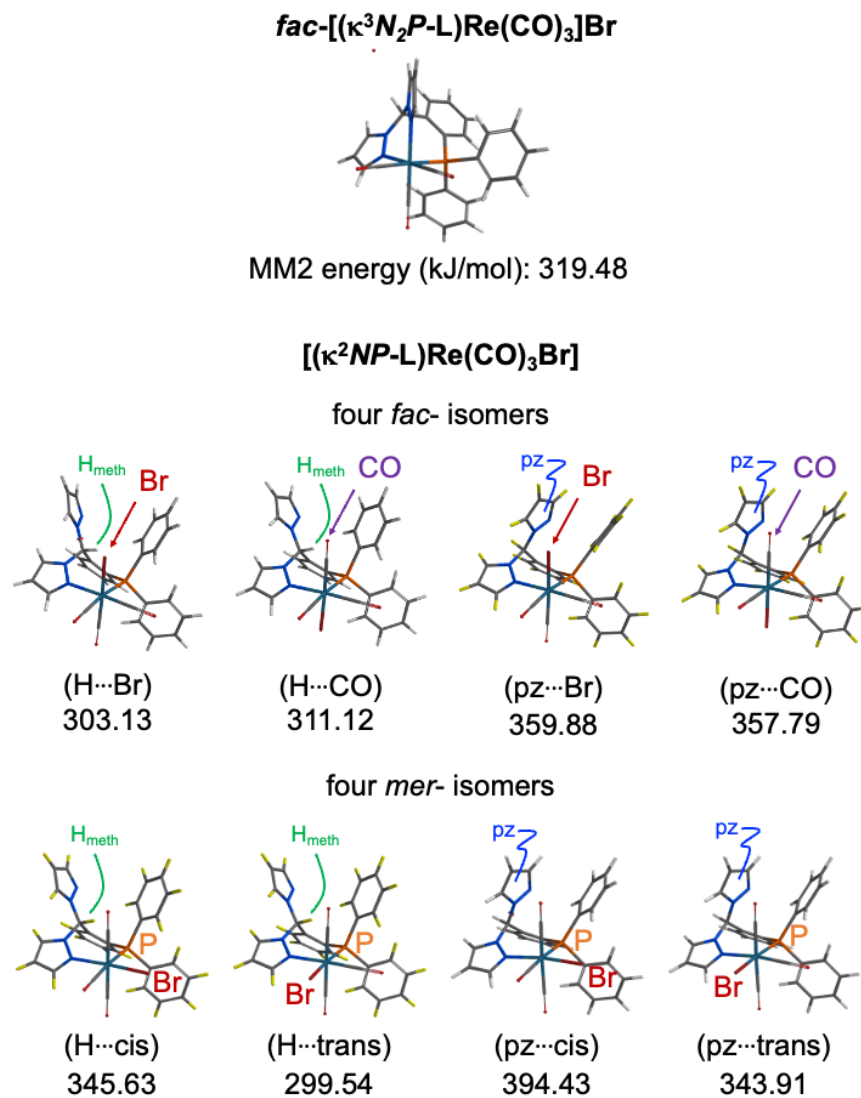

**Figure S2.** Possible isomers of [(pz<sub>2</sub>TTP)Re(CO)<sub>3</sub>Br].

species with a κ<sup>2</sup>NP- ligand. Of these latter, four can have *mer*- Re(CO)<sub>3</sub> moieties with the remaining being *fac*-Re(CO)<sub>3</sub> derivatives. All the κ<sup>2</sup>NP- derivatives possess seven-membered chelate rings with the methine carbon at the bow and the Re-P bond at the stern of a boat conformation. Both the methine and Re center are chiral centers. The methine carbon can have either a hydrogen or the unbound pz pointing inside the boat. The *fac*-(κ<sup>2</sup>NP)- derivatives always have CO's *trans*- to the P- and bound pz nitrogen. So, either a Re-Br or a Re-CO can sit inside the boat. Thus, the four *fac*-(κ<sup>2</sup>NP)- isomers can be distinguished by the substituents sitting inside the boat: (H...Br), (H...CO), (pz...Br), or (pz...CO). For *mer*-(κ<sup>2</sup>NP)- isomers, a Re-CO is always inside the boat. However, the bromide can either be *cis*- or *trans*- to the phosphorous. So, four isomers are distinguished: (H...cis), (H...trans), (pz...cis), and (pz...trans). Steric

analysis using molecular models (MM2 energy) suggested the three lowest energy ( $\kappa^2NP$ )-isomers are  $(H\cdots trans) < (H\cdots Br) < (H\cdots CO)$ . Higher level DFT calculations (M06L/Def2-TZVP/PCM  $CH_3CN$ ) indicate the latter two are nearly degenerate and lower energy than the former (vide infra, Table S3). However, the single crystal X-ray diffraction identified only  $(H\cdots Br)$ , (major) and  $(H\cdots CO)$ , (minor). NMR and PXRD studies on crude samples indicate up to four isomers might be formed in the crude reaction. After crystallization from either  $CH_2Cl_2$ /hexane or toluene/hexane, two isomers predominate. Figures S3 and S4 show the NMR spectrum of single crystals dissolved in different solvents ( $CD_3CN$ , and  $CD_2Cl_2$ , respectively). Where resonances for major isomers are labeled IA,B and minor isomers IIA,B, etc. Figure S5 shows PXRD data of crude sample before crystallization.

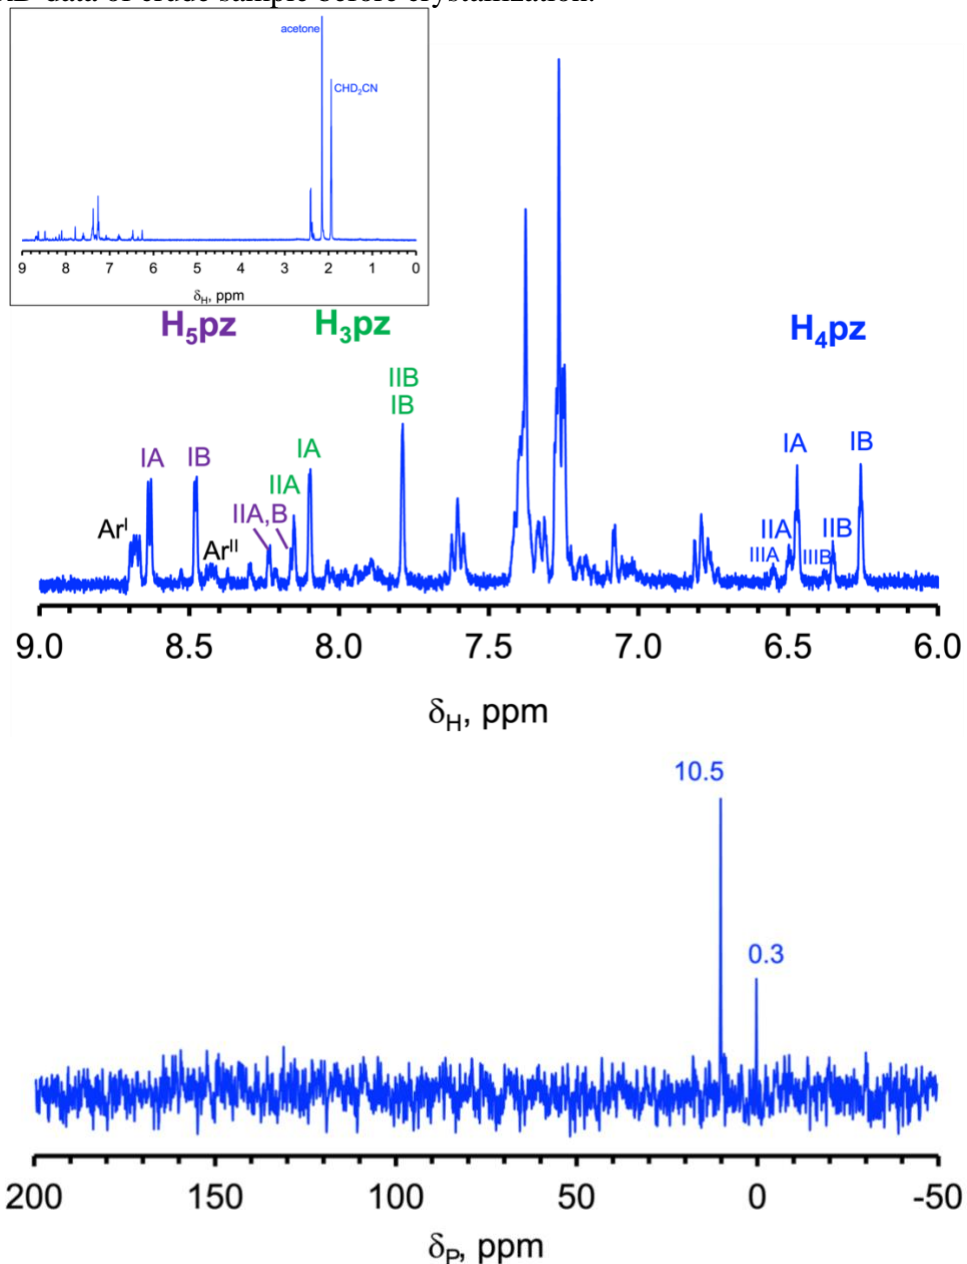

**Figure S3.**  $^1H$  NMR (top with inset) and  $^{31}P$  NMR (bottom) spectra of single crystals of **1** dissolved in  $CD_3CN$ .

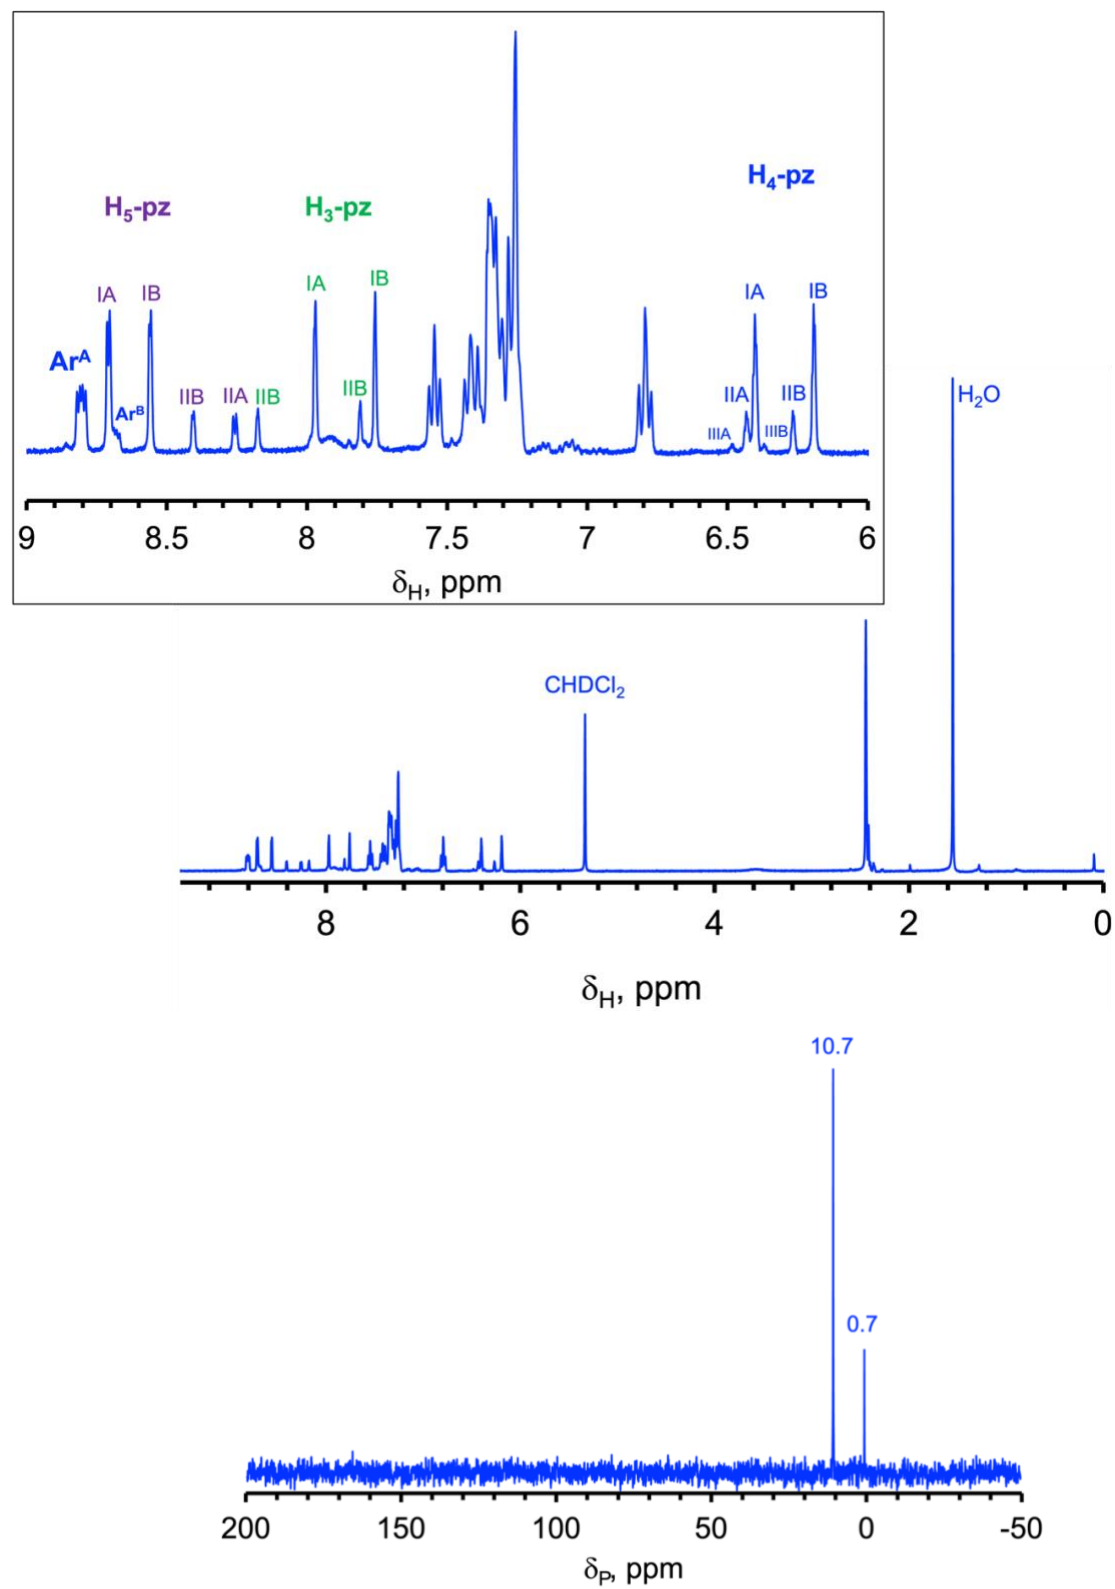

**Figure S4.** <sup>1</sup>H NMR (top with inset) and <sup>31</sup>P NMR (bottom) spectra of single crystals of **1** dissolved in CD<sub>2</sub>Cl<sub>2</sub>.

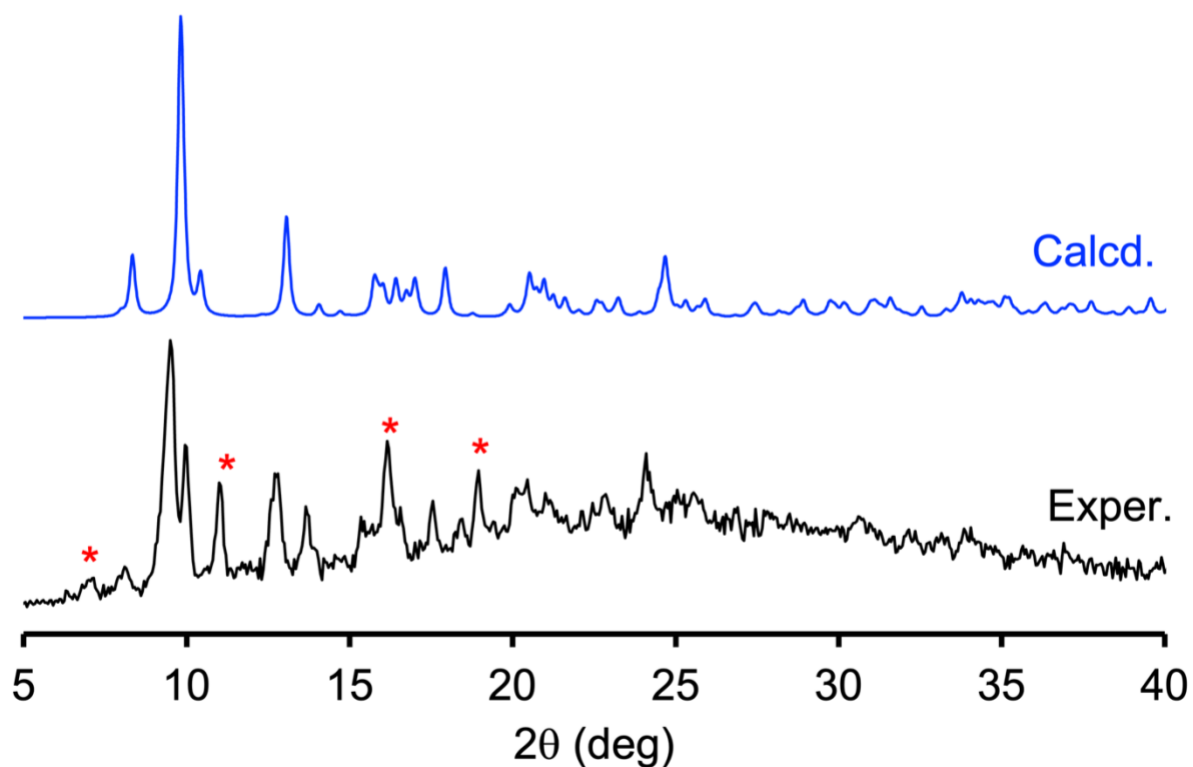

**Figure S5.** PXRD of powder obtained from synthesis of **1** prior to crystallization. The diffractogram labeled “Calcd”, is that calculated from single crystal diffraction data of solvate-free **1**. The red asterisks in the experimental spectra are attributed to a new crystalline phase, likely  $\text{fac-}[(\kappa^3\text{N}_2\text{P-pz}_2\text{TTP})\text{Re}(\text{CO})_3](\text{Br})$ .



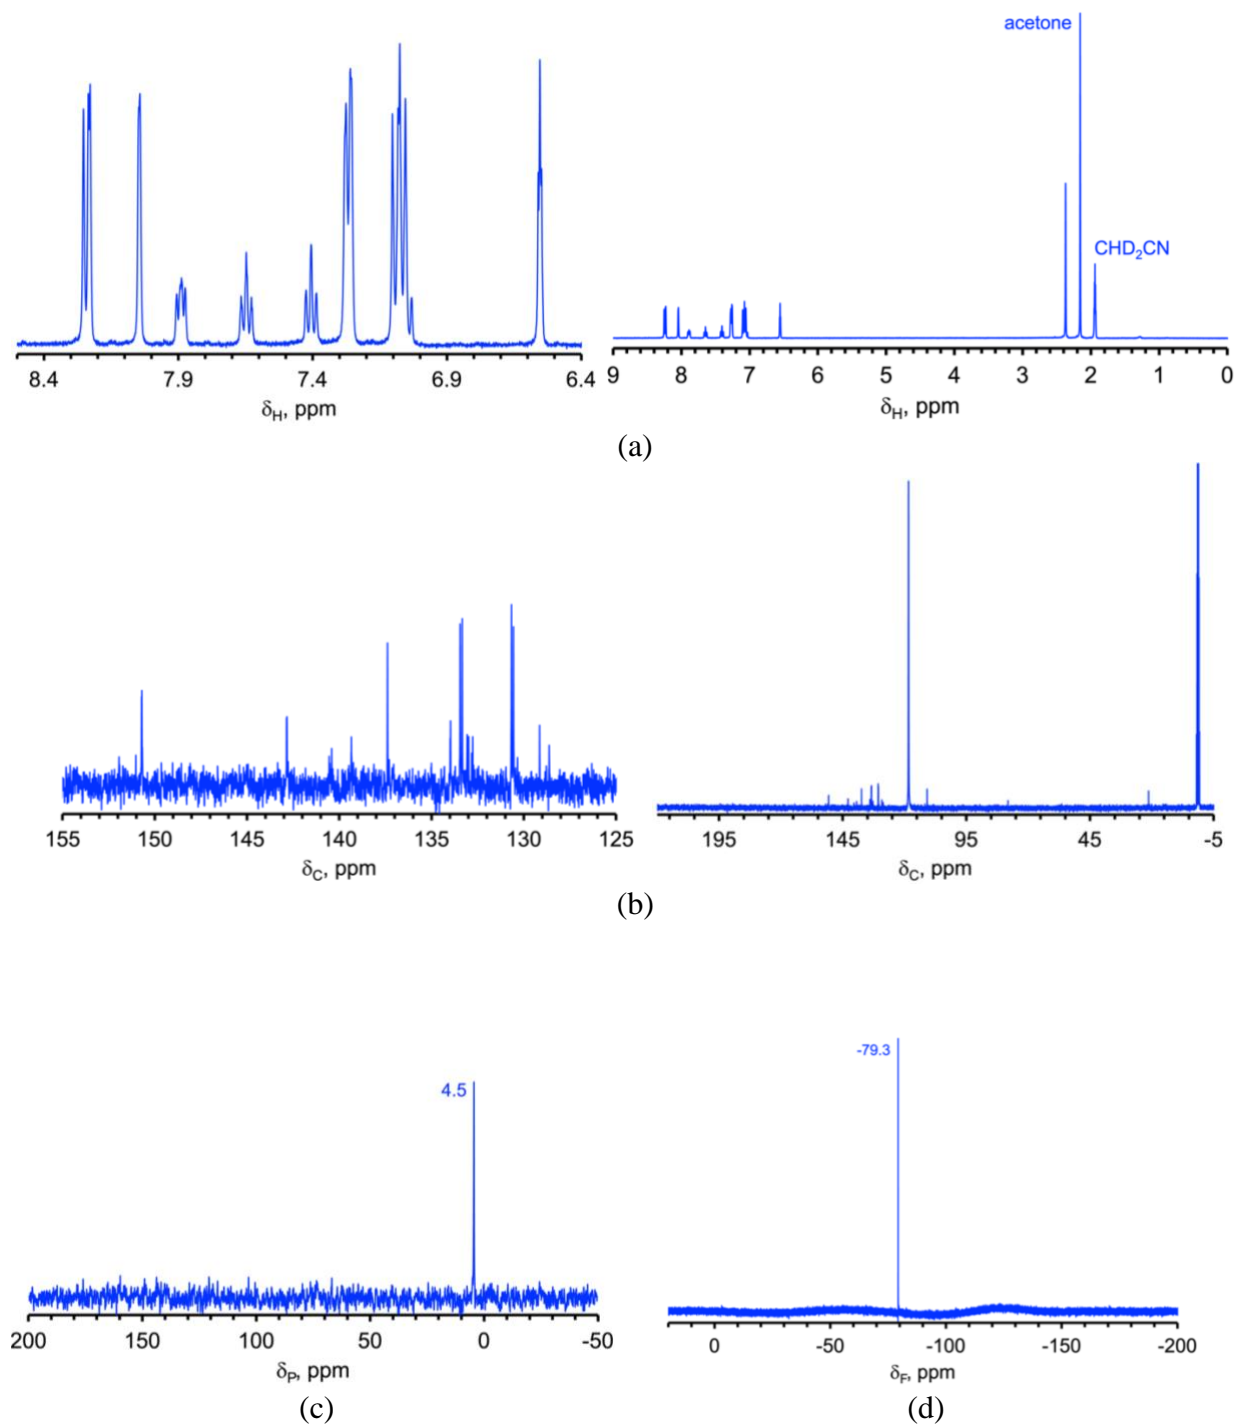

**Figure S6.** (a)  $^1\text{H}$  (b)  $^{13}\text{C}$  (c)  $^{31}\text{P}$  and (d)  $^{19}\text{F}$  NMR spectra of **2-Re** in  $\text{CD}_3\text{CN}$ .

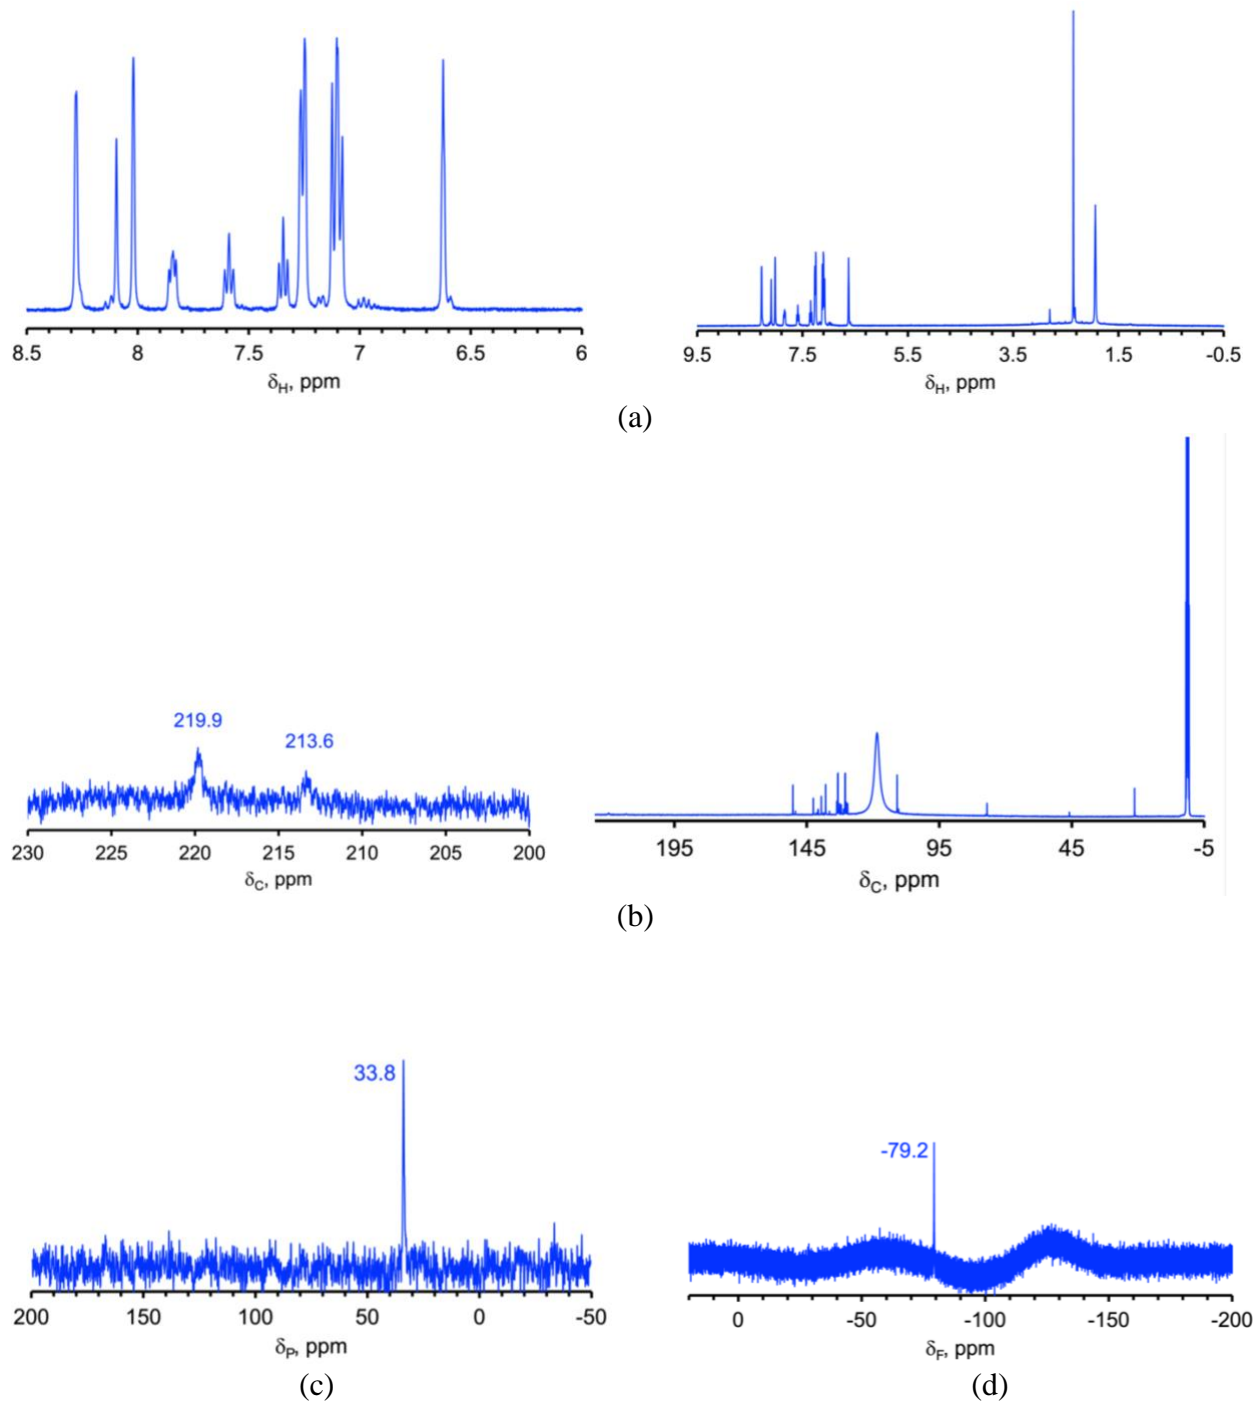

**Figure S7.** (a)  $^1\text{H}$  (b)  $^{13}\text{C}$  (c)  $^{31}\text{P}$  and (d)  $^{19}\text{F}$  NMR spectra of **2-Mn** in  $\text{CD}_3\text{CN}$ .

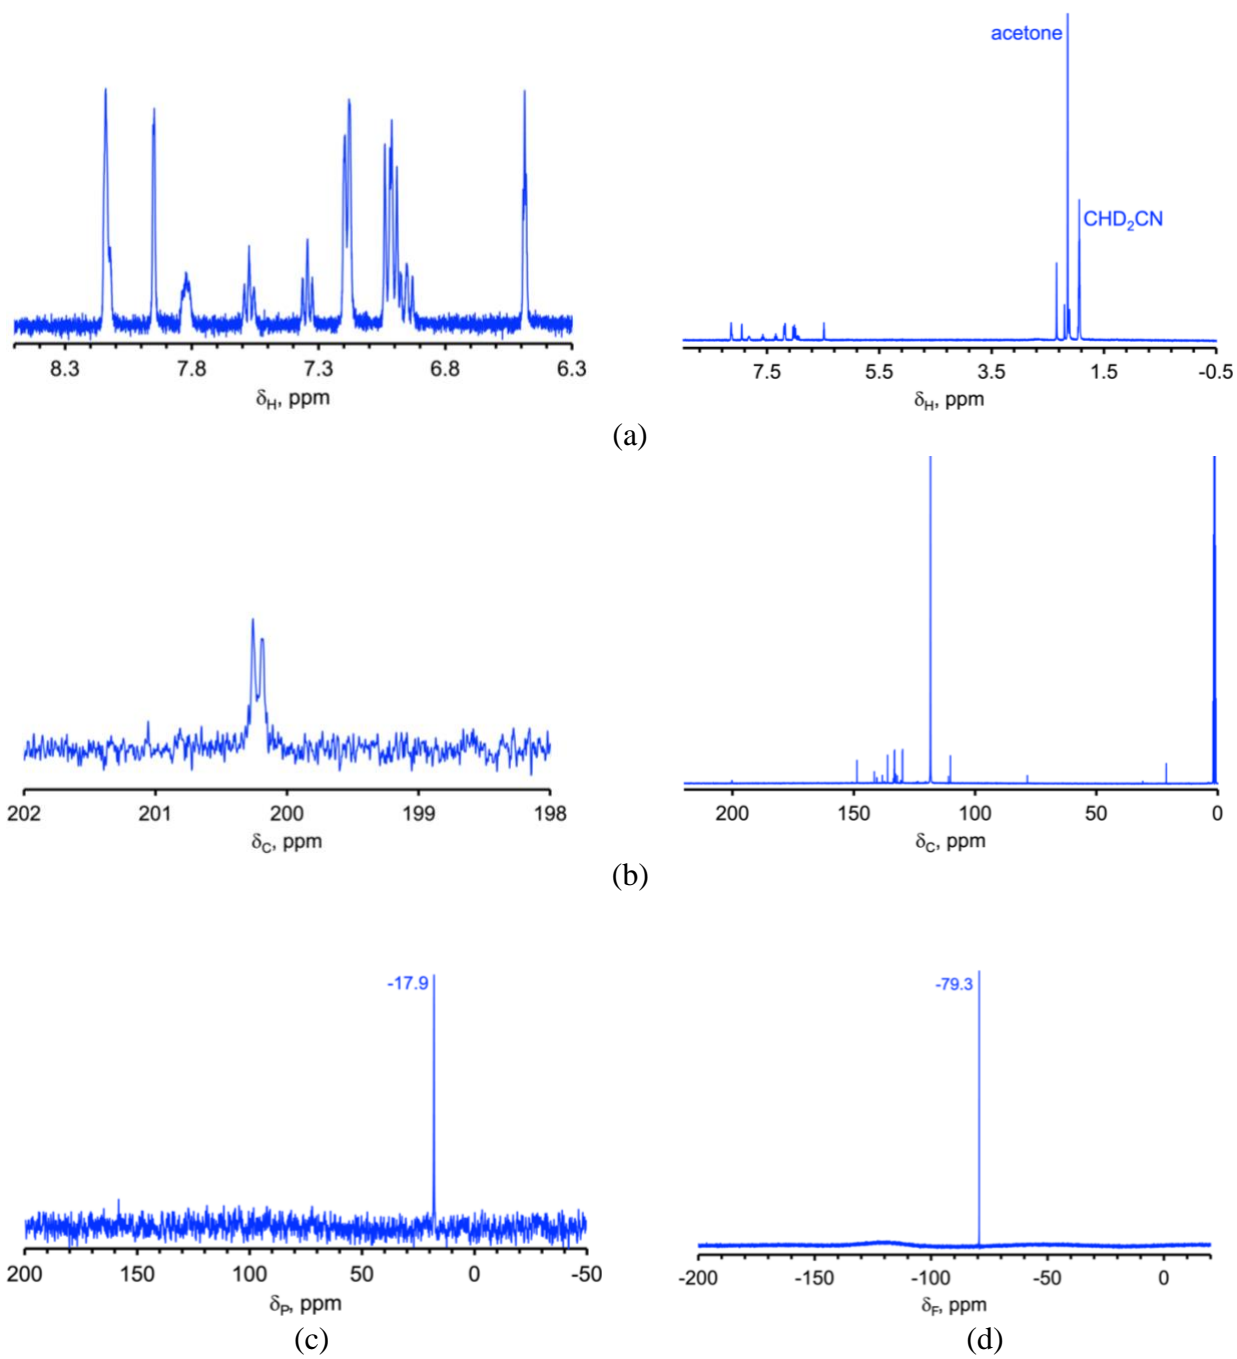

**Figure S8.** (a)  $^1\text{H}$  (b)  $^{13}\text{C}$  (c)  $^{31}\text{P}$  and (d)  $^{19}\text{F}$  NMR spectra of **3-Re** in  $\text{CD}_3\text{CN}$ .

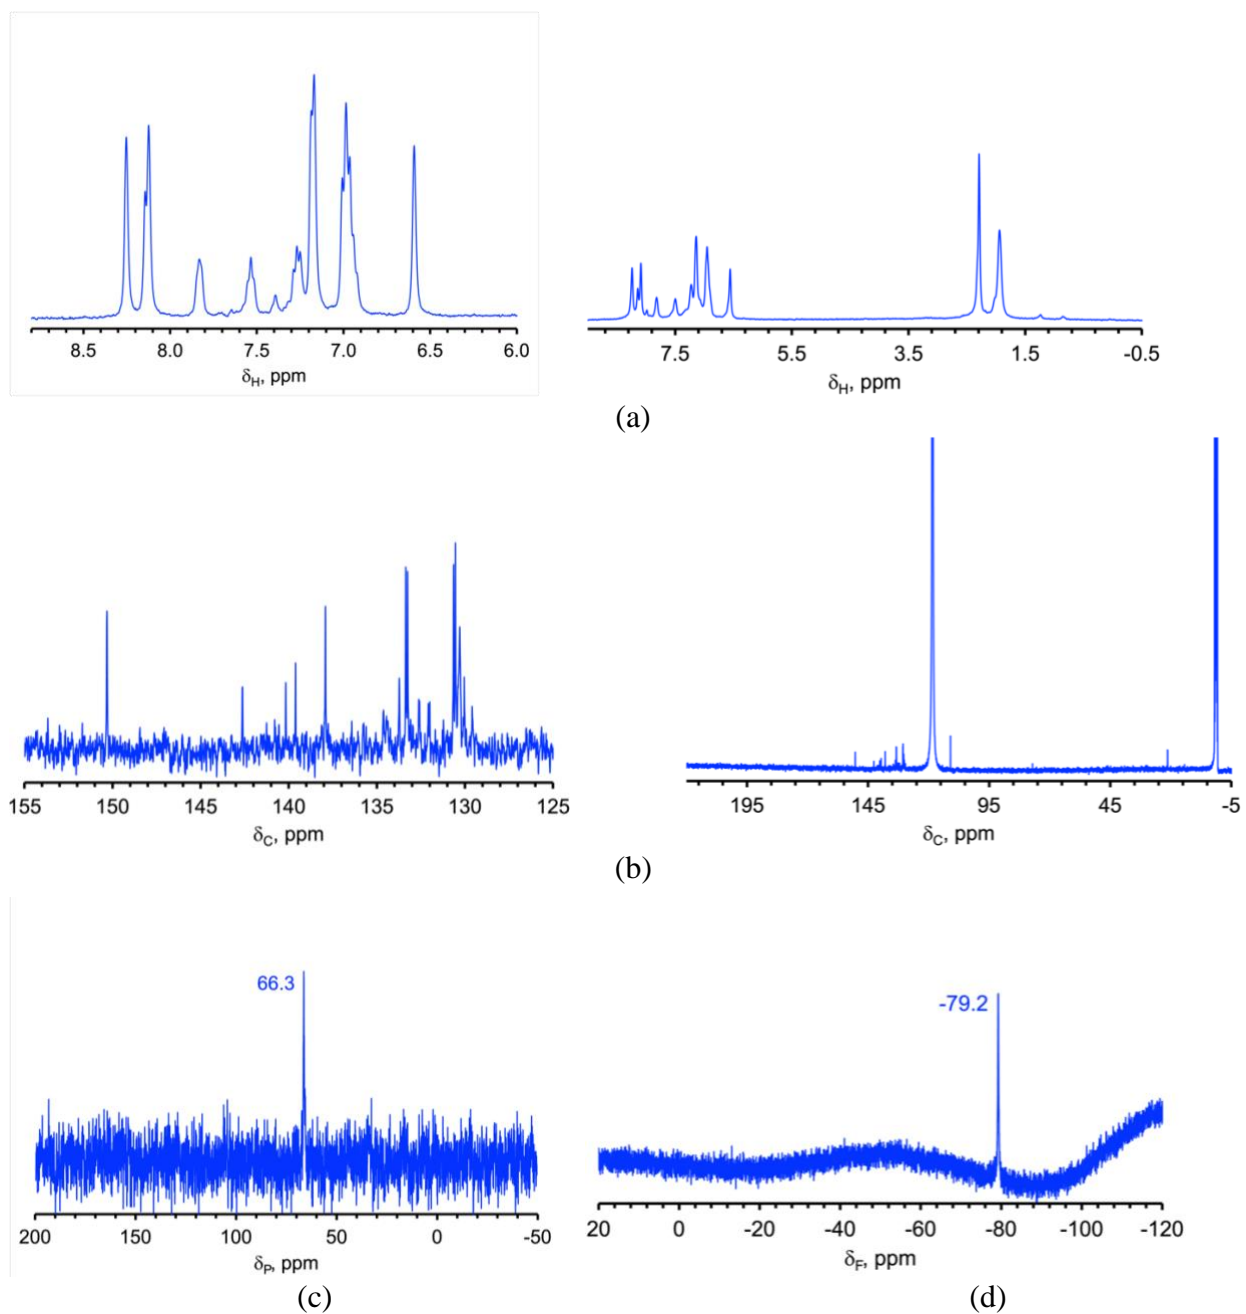

**Figure S9.** (a)  $^1\text{H}$  (b)  $^{13}\text{C}$  (c)  $^{31}\text{P}$  and (d)  $^{19}\text{F}$  NMR spectra of **3-Mn** in  $\text{CD}_3\text{CN}$ .

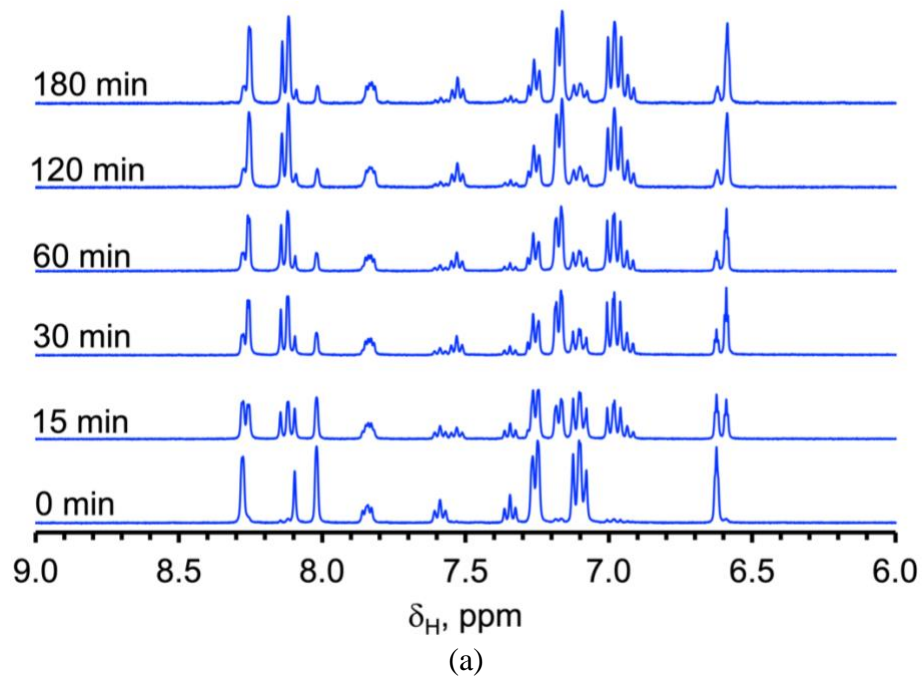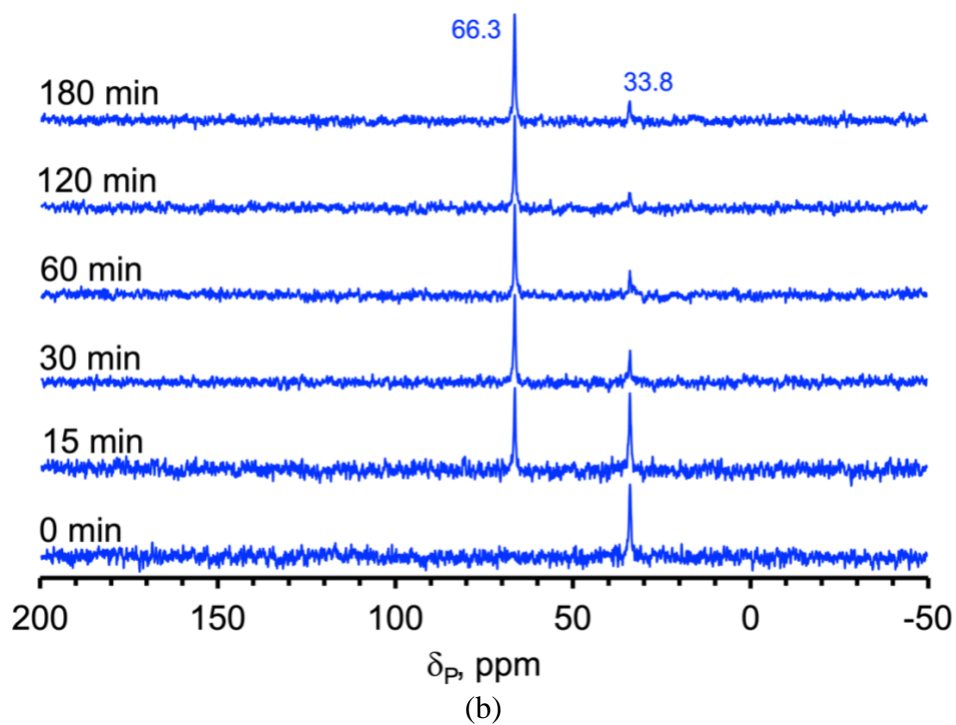

**Figure S10.** Overlay of  $^1\text{H}$  (a) and  $^{31}\text{P}$  (b) NMR spectra obtained before (bottom) and after heating a closed tube containing a  $\text{CD}_3\text{CN}$  solution of **2-Mn** in an  $80^\circ\text{C}$  oil bath for designated time periods.

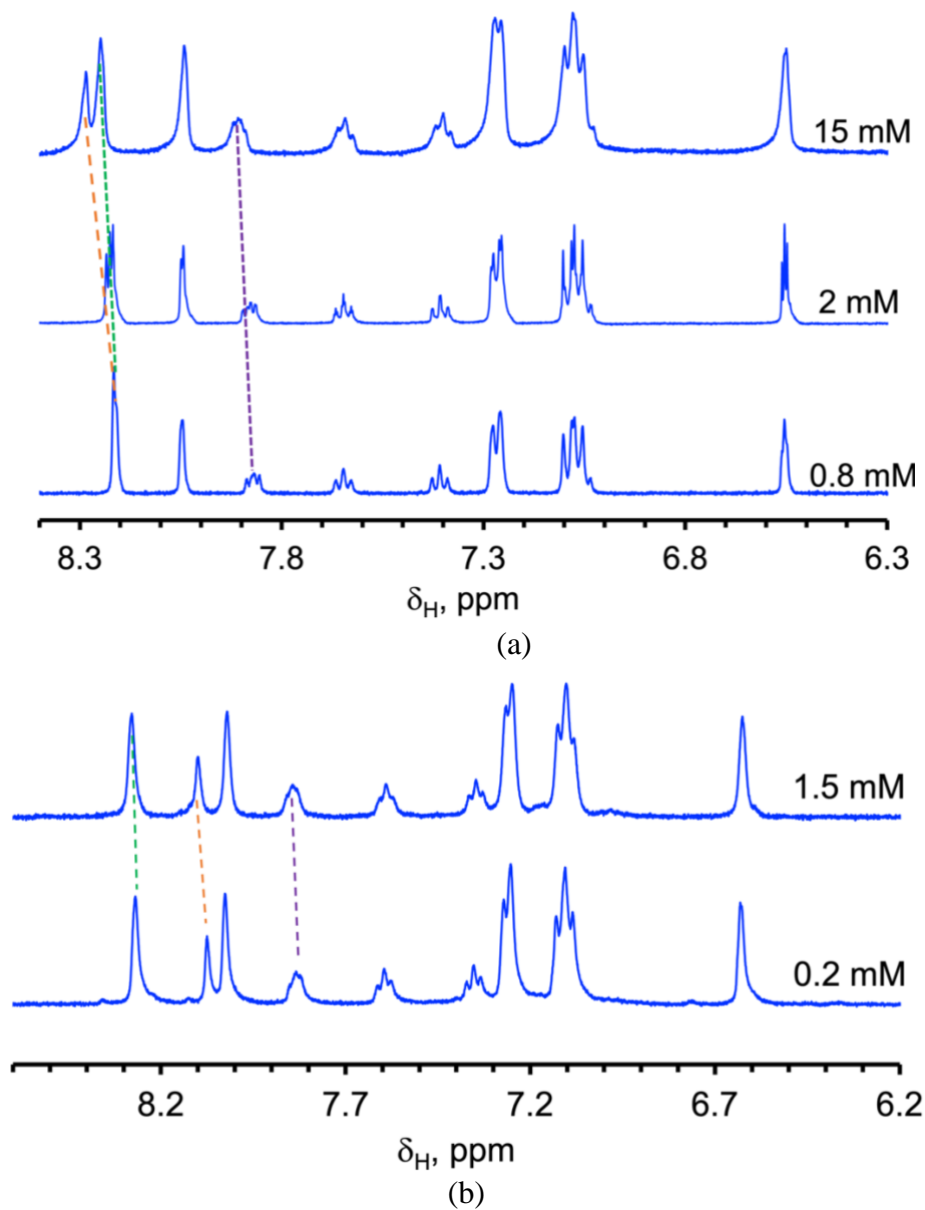

**Figure S11.**  $^1\text{H}$  NMR spectra obtained for various concentrations of **2-Re** (a) or **2-Mn** (b) in  $\text{CD}_3\text{CN}$ . Dotted lines show resonances that shift frequency. Orange dashed line is for  $\text{H}_{\text{methine}}$ , green dashed line corresponds to  $\text{H}_{5\text{pz}}$  and purple dashed line is for  $\text{H}_{3\text{Ar}}$ . The other resonances do not shift.

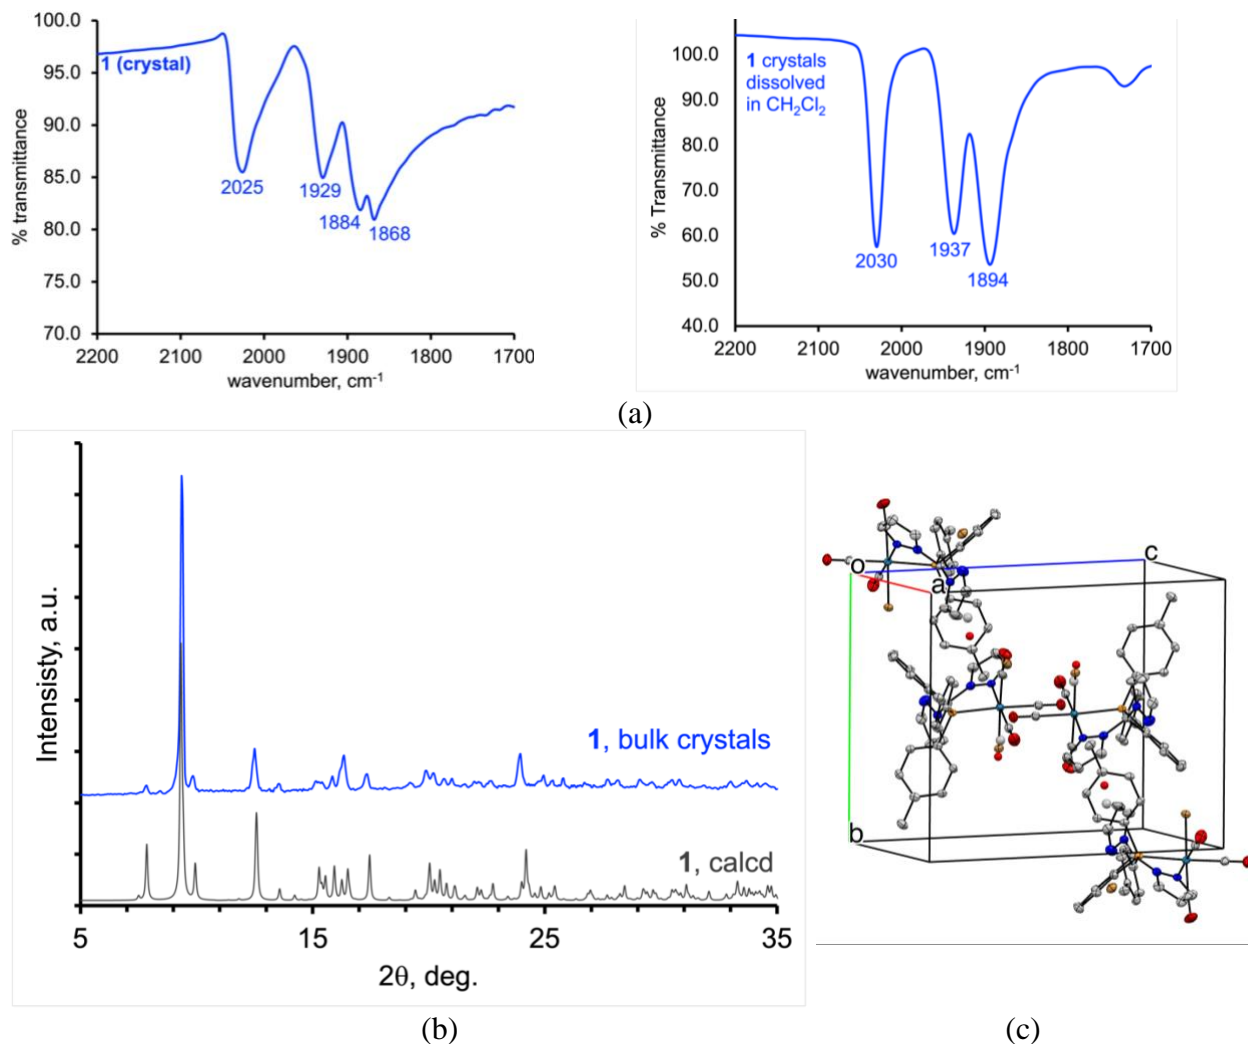

**Figure S12.** (a) Carbonyl stretching region of IR spectrum of bulk crystals of **1** in solid state and after crystals are dissolved in CH<sub>2</sub>Cl<sub>2</sub>. (b) 295 K PXRD spectrum of the same sample of bulk crystals of **1** compared to that calculated from the 100 K single crystal diffraction data. (c) View of packing of unit cell.

The observation of four CO stretches in the solid spectrum of analytically pure single crystals of **1** Figure S12a (left) was clearly unexpected. Dissolving the crystals in CH<sub>2</sub>Cl<sub>2</sub> gives the expected three bands Figure S12a (right). The powder diffractogram shows only one phase (Figure S12b). So, the unexpected number of bands may be due to crystal packing effects whereby the low symmetry about a dimer of molecules in the unit cell (Figure S12c) may be responsible for splitting bands.

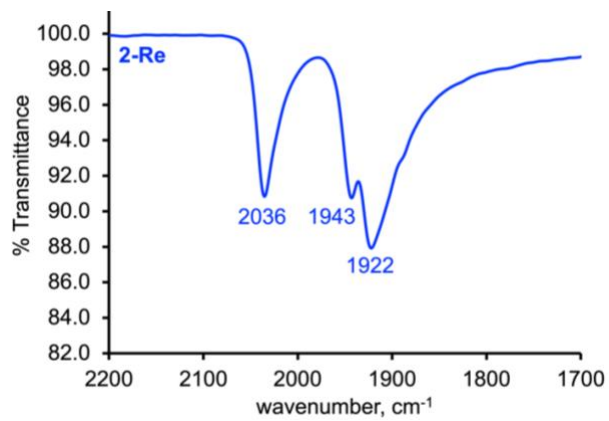

(a)

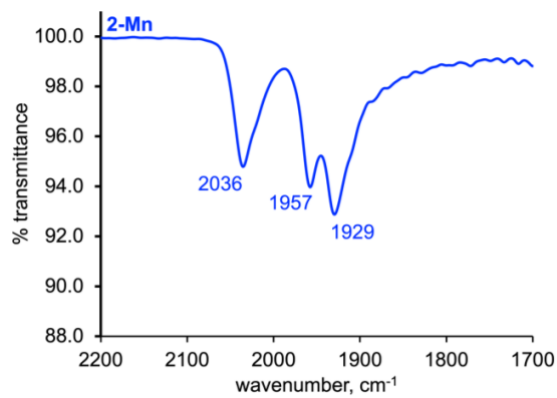

(b)

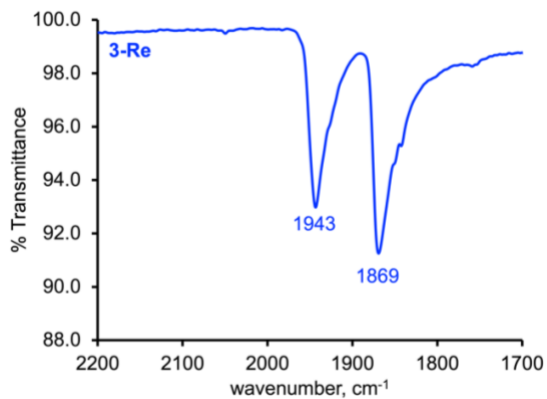

(c)

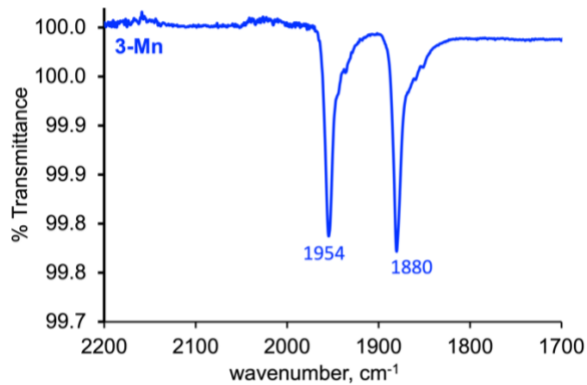

(d)

**Figure S13.** Carbonyl stretching region of solid-state IR spectra of (a) **2-Re**, (b) **2-Mn**, (c) **3-Re**, and (d) **3-Mn**.



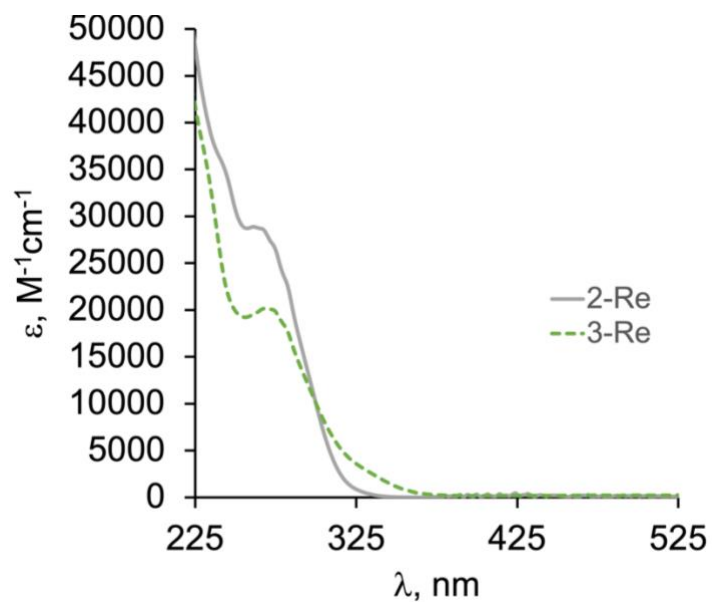

**Figure S14.** Overlay of electronic absorption spectra of **2-Re** and **3-Re** in CH<sub>3</sub>CN.

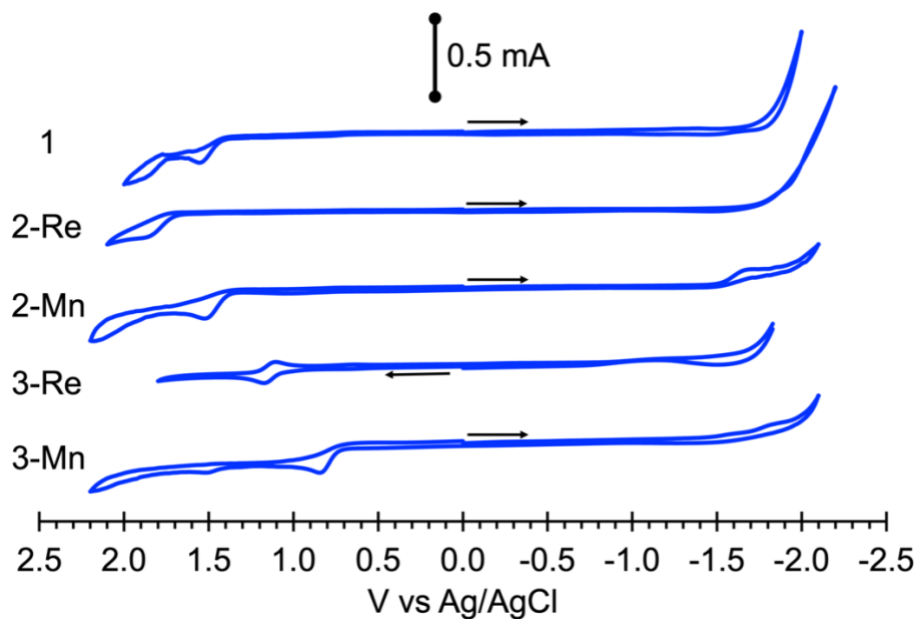

**Figure S15.** Cyclic voltammograms (200 mV/S) of new compounds (~1 mM in CH<sub>3</sub>CN) with NBu<sub>4</sub>PF<sub>6</sub> as supporting electrolyte.

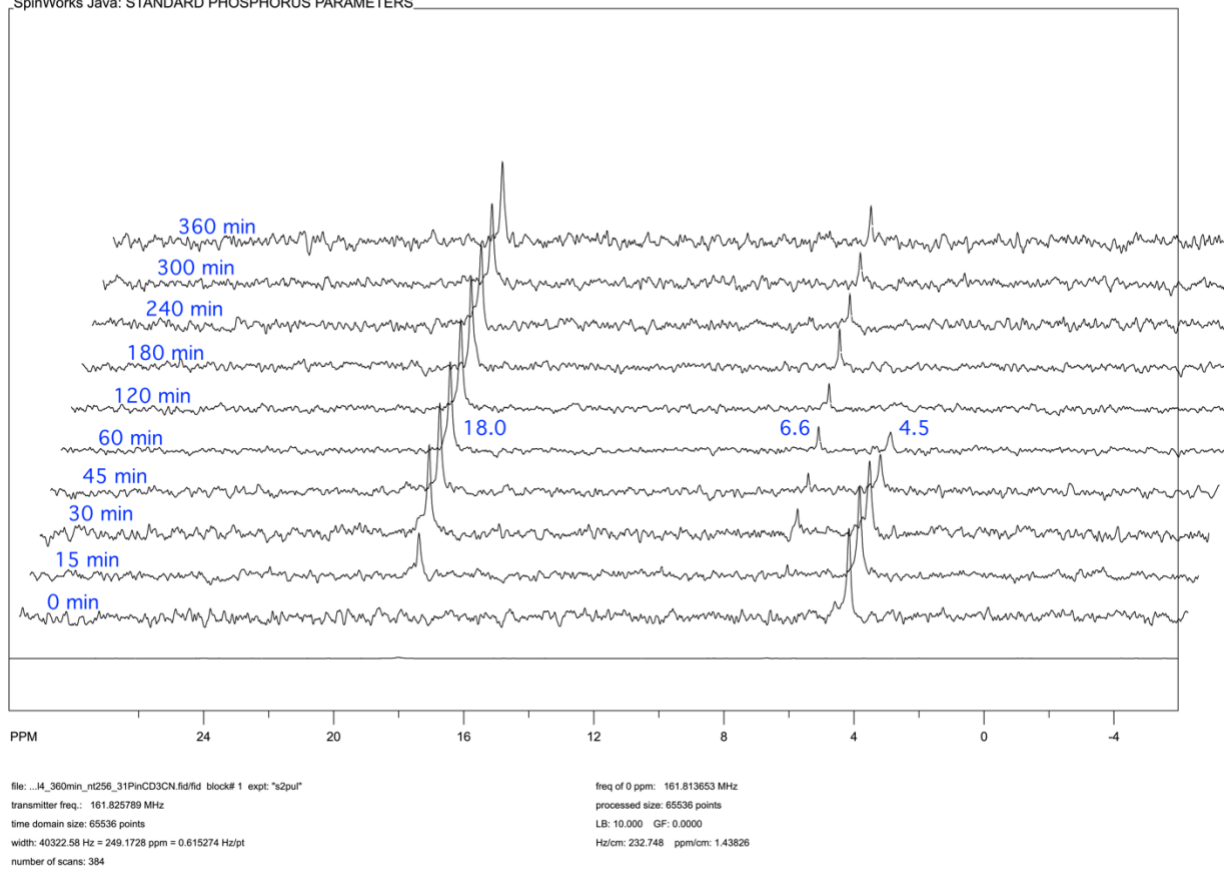

**Figure S16.** Overlay of  $^{31}\text{P}$  NMR spectra obtained during photoirradiation of a  $\text{CD}_3\text{CN}$  solution of **2-Re** by UV-C light.

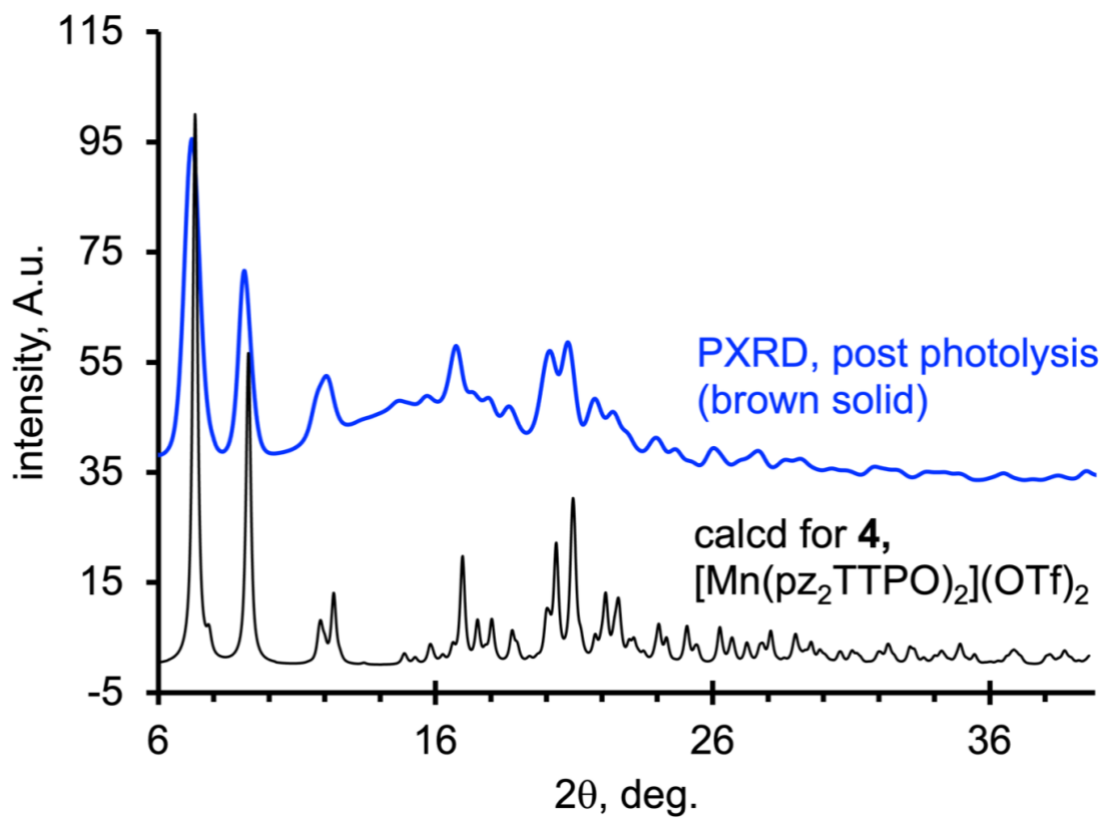

**Figure S17.** Diffractogram of crude brown product obtained after removing solvent from photodecomposition of **2-Mn** by 390 nm light (top blue trace), showing a mixture of an amorphous phase and **4**. Diffractogram of **4** (bottom black trace) calculated from single crystal diffraction data.

**Table S3.** Summary of SCF energies and Thermodynamic Properties for various compounds at the M06L/Def2TZVP (PCM CH<sub>3</sub>CN) level.

| Compound                                                                       | S   | E <sub>scf</sub> (a.u.) | ZPE corr (a.u.) | G (a.u.)     | H (a.u.)     | S (cal/mol*K) |
|--------------------------------------------------------------------------------|-----|-------------------------|-----------------|--------------|--------------|---------------|
| CH <sub>3</sub> CN                                                             | 0   | -132.796849765          | 0.045450        | -132.775359  | -132.746897  | 59.904        |
| CO                                                                             | 0   | -113.344569170          | 0.005011        | -113.358678  | -113.336253  | 47.198        |
| [(pz <sub>2</sub> TTP')Mn(CO) <sub>3</sub> ] <sup>0</sup>                      | 3/2 | -3017.04415772          | 0.431237        | -3016.680681 | -3016.579103 | 213.789       |
| [(pz <sub>2</sub> TTP')Mn(CO) <sub>3</sub> ] <sup>+</sup>                      | 0   | -3016.95676838          | 0.435772        | -3016.584959 | -3016.488326 | 203.382       |
| [(pz <sub>2</sub> TTP')Mn(CO) <sub>3</sub> ] <sup>2+</sup>                     | 3/2 | -3016.73548885          | 0.434785        | -3016.365806 | -3016.267326 | 207.267       |
|                                                                                | 5/2 | -3016.71728756          | 0.428712        | -3016.361905 | -3016.251547 | 232.270       |
|                                                                                |     |                         |                 |              |              |               |
| [(pz <sub>2</sub> TTP')Mn(CO) <sub>2</sub> (CH <sub>3</sub> CN)] <sup>0</sup>  | 3/2 | -3036.47075178          | 0.469408        | -3036.069427 | -3035.965805 | 218.089       |
| [(pz <sub>2</sub> TTP')Mn(CO) <sub>2</sub> (CH <sub>3</sub> CN)] <sup>+</sup>  | 0   | -3036.39036828          | 0.474213        | -3035.982910 | -3035.881795 | 212.816       |
| [(pz <sub>2</sub> TTP')Mn(CO) <sub>2</sub> (CH <sub>3</sub> CN)] <sup>2+</sup> | 3/2 | -3036.19727530          | 0.474286        | -3035.791980 | -3035.687405 | 220.098       |
|                                                                                | 5/2 | -3036.19017508          | 0.468858        | -3035.798104 | -3035.682486 | 243.338       |
|                                                                                |     |                         |                 |              |              |               |
| [(pz <sub>2</sub> TTP')Mn(CO)(CH <sub>3</sub> CN) <sub>2</sub> ] <sup>0</sup>  | 3/2 | -3055.88748577          | 0.507422        | -3055.449420 | -3055.342950 | 224.084       |
| [(pz <sub>2</sub> TTP')Mn(CO)(CH <sub>3</sub> CN) <sub>2</sub> ] <sup>+</sup>  | 0   | -3055.81236238          | 0.512958        | -3055.369692 | -3055.261947 | 226.767       |
| [(pz <sub>2</sub> TTP')Mn(CO)(CH <sub>3</sub> CN) <sub>2</sub> ] <sup>2+</sup> | 3/2 | -3055.65371876          | 0.514496        | -3055.209263 | -3055.101818 | 226.137       |
|                                                                                | 5/2 | -3055.65877509          | 0.508604        | -3055.229525 | -3055.109568 | 252.469       |
|                                                                                |     |                         |                 |              |              |               |
| [(pz <sub>2</sub> TTP')Mn(CH <sub>3</sub> CN) <sub>3</sub> ] <sup>0</sup>      | 3/2 | -3075.29461533          | 0.545182        | -3074.823127 | -3074.709075 | 240.043       |
| [(pz <sub>2</sub> TTP')Mn(CH <sub>3</sub> CN) <sub>3</sub> ] <sup>+</sup>      | 0   | -3075.22527170          | 0.550567        | -3074.746148 | -3074.635669 | 232.524       |
| [(pz <sub>2</sub> TTP')Mn(CH <sub>3</sub> CN) <sub>3</sub> ] <sup>2+</sup>     | 3/2 | -3075.08848891          | 0.553206        | -3074.607865 | -3074.495692 | 236.089       |
|                                                                                | 5/2 | -3075.12608556          | 0.548992        | -3074.658212 | -3074.534857 | 259.622       |
|                                                                                |     |                         |                 |              |              |               |
| <i>fac</i> -[(pz <sub>2</sub> TTP')Re(CO) <sub>3</sub> Br] <sup>-1</sup> (HBr) | 3/2 | -4518.72202031          | 0.432334        | -4518.361125 | -4518.253621 | 226.261       |
| <i>fac</i> -[(pz <sub>2</sub> TTP')Re(CO) <sub>3</sub> Br] <sup>0</sup> (HBr)  | 0   | -4518.63791007          | 0.434419        | -4518.273378 | -4518.167809 | 222.188       |
| <i>fac</i> -[(pz <sub>2</sub> TTP')Re(CO) <sub>3</sub> Br] <sup>+1</sup> (HBr) | 3/2 | -4518.42449136          | 0.433886        | -4518.060966 | -4517.954638 | 223.787       |
| <i>fac</i> -[(pz <sub>2</sub> TTP')Re(CO) <sub>3</sub> Br] <sup>0</sup> (HCO)  | 0   | -4518.63721758          | 0.434070        | -4518.273544 | -4518.167381 | 223.438       |
| <i>mer, trans</i> -[(pz <sub>2</sub> TTP')Re(CO) <sub>3</sub> Br] <sup>0</sup> | 0   | -4518.62067018          | 0.433820        | -4518.256960 | -4518.150987 | 223.038       |
| <i>mer, cis</i> -[(pz <sub>2</sub> TTP')Re(CO) <sub>3</sub> Br] <sup>0</sup>   | 0   | -4518.60224517          | 0.433284        | -4518.239965 | -4518.132890 | 225.359       |
|                                                                                |     |                         |                 |              |              |               |
| [(pz <sub>2</sub> TTP')Re(CO) <sub>3</sub> ] <sup>0</sup>                      | 3/2 | -1944.47670902          | 0.430063        | -1944.112241 | -1944.013254 | 208.336       |
| [(pz <sub>2</sub> TTP')Re(CO) <sub>3</sub> ] <sup>+</sup>                      | 0   | -1944.38912605          | 0.434967        | -1944.019760 | -1943.921074 | 207.702       |
| [(pz <sub>2</sub> TTP')Re(CO) <sub>3</sub> ] <sup>2+</sup>                     | 3/2 | -1944.15837789          | 0.434511        | -1943.789685 | -1943.690521 | 208.709       |
|                                                                                |     |                         |                 |              |              |               |
| [(pz <sub>2</sub> TTP')Re(CO) <sub>2</sub> (CH <sub>3</sub> CN)] <sup>0</sup>  | 3/2 | -1963.89860715          | 0.468672        | -1963.497947 | -1963.394914 | 216.852       |
| [(pz <sub>2</sub> TTP')Re(CO) <sub>2</sub> (CH <sub>3</sub> CN)] <sup>+</sup>  | 0   | -1963.81672168          | 0.473712        | -1963.412803 | -1963.307490 | 221.650       |
| [(pz <sub>2</sub> TTP')Re(CO) <sub>2</sub> (CH <sub>3</sub> CN)] <sup>2+</sup> | 3/2 | -1963.61412314          | 0.473825        | -1963.210058 | -1963.104571 | 222.016       |

pz<sub>2</sub>TTP' = ligand with tolyl methyls replaced by H's

**Table S4.** Calculated IR CO and/or CN ( $> 2200 \text{ cm}^{-1}$ ) stretching energies and intensities (Int) of bands of organic compounds and manganese complexes.

| Compound M06L                                                                  | S                           | IR cm-1        | int     | IR cm-1        | int     | IR cm-1        | int     | $\bar{\nu}_{\text{CO}}$ |
|--------------------------------------------------------------------------------|-----------------------------|----------------|---------|----------------|---------|----------------|---------|-------------------------|
| Def2-TZVP                                                                      |                             |                |         |                |         |                |         |                         |
| CH <sub>3</sub> CN                                                             |                             | 2343.41        | 57.33   |                |         |                |         |                         |
|                                                                                |                             | <b>2296.54</b> |         |                |         |                |         |                         |
| CO                                                                             |                             | 2199.75        | 97.40   |                |         |                |         |                         |
|                                                                                |                             | <b>2155.76</b> |         |                |         |                |         | <b>2156</b>             |
| [(pz <sub>2</sub> TTP')Mn(CO) <sub>3</sub> ] <sup>0</sup>                      | <sup>1</sup> / <sub>2</sub> | 1870.65        | 2589.76 | 1875.49        | 2099.26 | 1982.41        | 2341.36 | 1910                    |
|                                                                                |                             | <b>1823.88</b> |         | <b>1828.60</b> |         | <b>1932.85</b> |         | <b>1862</b>             |
| [(pz <sub>2</sub> TTP')Mn(CO) <sub>3</sub> ] <sup>+</sup>                      | 0                           | 1993.91        | 1637.22 | 2009.67        | 1505.35 | 2093.27        | 1503.81 | 2032                    |
|                                                                                |                             | <b>1944.06</b> |         | <b>1959.43</b> |         | <b>2040.94</b> |         | <b>1981</b>             |
| [(pz <sub>2</sub> TTP')Mn(CO) <sub>3</sub> ] <sup>2+</sup>                     | <sup>1</sup> / <sub>2</sub> | 2068.02        | 1095.36 | 2126.40        | 1046.33 | 2183.22        | 1293.01 | 2126                    |
|                                                                                |                             | <b>2016.32</b> |         | <b>2073.24</b> |         | <b>2128.64</b> |         | <b>2073</b>             |
|                                                                                | <sup>5</sup> / <sub>2</sub> | 2251.76        | 90.92   | 2256.57        | 167.77  | 2265.22        | 166.37  | 2258                    |
|                                                                                |                             | <b>2195.47</b> |         | <b>2200.16</b> |         | <b>2208.59</b> |         | <b>2201</b>             |
| [(pz <sub>2</sub> TTP')Mn(CO) <sub>2</sub> (CH <sub>3</sub> CN)] <sup>0</sup>  | <sup>1</sup> / <sub>2</sub> | 1918.70        | 1746.49 | 1989.84        | 1685.53 | 2359.48        | 32.55   | 1954                    |
|                                                                                |                             | <b>1870.74</b> |         | <b>1940.10</b> |         | <b>2300.49</b> |         | <b>1905</b>             |
| [(pz <sub>2</sub> TTP')Mn(CO) <sub>2</sub> (CH <sub>3</sub> CN)] <sup>+</sup>  | 0                           | 1945.69        | 1847.24 | 2013.22        | 1565.04 | 2369.01        | 4.62    | 1979                    |
|                                                                                |                             | <b>1897.05</b> |         | <b>1962.89</b> |         | <b>2309.78</b> |         | <b>1930</b>             |
| [(pz <sub>2</sub> TTP')Mn(CO) <sub>2</sub> (CH <sub>3</sub> CN)] <sup>2+</sup> | <sup>1</sup> / <sub>2</sub> | 2039.72        | 1218.98 | 2119.95        | 1227.06 | 2379.21        | 206.29  | 2080                    |
|                                                                                |                             | <b>1988.73</b> |         | <b>2066.95</b> |         | <b>2319.73</b> |         | <b>2028</b>             |
|                                                                                | <sup>5</sup> / <sub>2</sub> | 2228.26        | 100.45  | 2248.054       | 150.74  | 2370.37        | 276.08  | 2238                    |
|                                                                                |                             | <b>2172.56</b> |         | <b>2191.85</b> |         | <b>2311.11</b> |         | <b>2182</b>             |
| [(pz <sub>2</sub> TTP')Mn(CO)(CH <sub>3</sub> CN) <sub>2</sub> ] <sup>0</sup>  | <sup>1</sup> / <sub>2</sub> | 1889.15        | 1927.93 | 2316.21        | 229.43  | 2336.49        | 208.73  | 2103                    |
|                                                                                |                             | <b>1841.92</b> |         | <b>2258.30</b> |         | <b>2278.08</b> |         | <b>2050</b>             |
| [(pz <sub>2</sub> TTP')Mn(CO)(CH <sub>3</sub> CN) <sub>2</sub> ] <sup>+</sup>  | 0                           | 1918.38        | 2060.30 | 2329.68        | 135.04  | 2351.24        | 77.25   | 1918                    |
|                                                                                |                             | <b>1870.42</b> |         | <b>2271.44</b> |         | <b>2292.46</b> |         | <b>1870</b>             |
| [(pz <sub>2</sub> TTP')Mn(CO)(CH <sub>3</sub> CN) <sub>2</sub> ] <sup>2+</sup> | <sup>1</sup> / <sub>2</sub> | 2029.85        | 1511.49 | 2373.72        | 76.64   | 2382.80        | 111.50  | 2030                    |
|                                                                                |                             | <b>1979.10</b> |         | <b>2314.38</b> |         | <b>2323.23</b> |         | <b>1979</b>             |
|                                                                                | <sup>5</sup> / <sub>2</sub> | 2227.74        | 135.31  | 2368.59        | 219.13  | 2371.67        | 221.39  | 2228                    |
|                                                                                |                             | <b>2172.04</b> |         | <b>2309.37</b> |         | <b>2312.38</b> |         | <b>2172</b>             |
| [(pz <sub>2</sub> TTP')Mn(CH <sub>3</sub> CN) <sub>3</sub> ] <sup>0</sup>      | <sup>1</sup> / <sub>2</sub> | 2259.09        | 829.65  | 2274.97        | 575.94  | 2307.41        | 640.08  |                         |
|                                                                                |                             | <b>2202.62</b> |         | <b>2218.10</b> |         | <b>2249.72</b> |         |                         |
| [(pz <sub>2</sub> TTP')Mn(CH <sub>3</sub> CN) <sub>3</sub> ] <sup>+</sup>      | 0                           | 2278.29        | 638.42  | 2295.38        | 398.97  | 2328.11        | 325.63  |                         |
|                                                                                |                             | <b>2221.34</b> |         | <b>2237.99</b> |         | <b>2269.90</b> |         |                         |
| [(pz <sub>2</sub> TTP')Mn(CH <sub>3</sub> CN) <sub>3</sub> ] <sup>2+</sup>     | <sup>1</sup> / <sub>2</sub> | 2357.25        | 10.74   | 2360.34        | 8.67    | 2370.09        | 4.52    |                         |
|                                                                                |                             | <b>2298.32</b> |         | <b>2301.33</b> |         | <b>2310.84</b> |         |                         |
|                                                                                | <sup>5</sup> / <sub>2</sub> | 2360.96        | 174.80  | 2369.57        | 184.16  | 2372.97        | 196.28  |                         |
|                                                                                |                             | <b>2301.94</b> |         | <b>2310.33</b> |         | <b>2313.65</b> |         |                         |

pz<sub>2</sub>TTP' = ligand with tolyl methyls replaced by H's

Bold values after and empirical correction factor for pure organic compounds:  $\bar{\nu}_{\text{corr}} = 0.98 * \bar{\nu}_{\text{raw}}$

Empirical correction factor for metal complexes:  $\bar{\nu}_{\text{corr}} = 0.975 * \bar{\nu}_{\text{raw}}$

**Table S5.** Calculated IR CO and/or CN ( $> 2200 \text{ cm}^{-1}$ ) stretching energies and intensities (Int) of bands of rhenium complexes.

| Compound M06L                                                                        | S     | IR $\text{cm}^{-1}$ | int     | IR $\text{cm}^{-1}$ | int     | IR $\text{cm}^{-1}$ | int     | $\bar{\nu}_{\text{CO}}$ |
|--------------------------------------------------------------------------------------|-------|---------------------|---------|---------------------|---------|---------------------|---------|-------------------------|
| Def2-TZVP                                                                            |       |                     |         |                     |         |                     |         |                         |
| <i>fac</i> -( $\text{pz}_2\text{TTP}'$ ) $\text{Re}(\text{CO})_3\text{Br}]^0$ (HCO)  | 0     | 1940.27             | 2267.07 | 1966.95             | 2045.60 | 2073.38             | 1679.34 | 1994                    |
|                                                                                      |       | <b>1891.76</b>      |         | <b>1917.78</b>      |         | <b>2021.55</b>      |         | <b>1944</b>             |
| <i>fac</i> -[( $\text{pz}_2\text{TTP}'$ ) $\text{Re}(\text{CO})_3\text{Br}]^0$ (HBr) | 0     | 1939.98             | 2293.97 | 1968.54             | 2016.05 | 2074.18             | 1740.99 | 1994                    |
|                                                                                      |       | <b>1891.48</b>      |         | <b>1919.33</b>      |         | <b>2022.33</b>      |         | <b>1944</b>             |
| <i>mer,trans</i> -[( $\text{pz}_2\text{TTP}'$ ) $\text{Re}(\text{CO})_3\text{Br}]^0$ | 0     | 1957.96             | 2025.80 | 1975.79             | 3905.87 | 2098.60             | 188.19  | 2011                    |
|                                                                                      |       | <b>1909.01</b>      |         | <b>1926.40</b>      |         | <b>2046.13</b>      |         | <b>1961</b>             |
| <i>mer,cis</i> [( $\text{pz}_2\text{TTP}'$ ) $\text{Re}(\text{CO})_3\text{Br}]^0$    | 0     | 1952.64             | 4175.32 | 1959.15             | 2064.27 | 2086.09             | 395.45  | 1999                    |
|                                                                                      |       | <b>1903.83</b>      |         | <b>1910.17</b>      |         | <b>2033.94</b>      |         | <b>1949</b>             |
| [( $\text{pz}_2\text{TTP}'$ ) $\text{Re}(\text{CO})_3]^0$                            | $1/2$ | 1943.37             | 2041.71 | 1950.90             | 2341.37 | 2058.88             | 2627.43 | 1984                    |
|                                                                                      |       | <b>1894.79</b>      |         | <b>1902.13</b>      |         | <b>2007.41</b>      |         | <b>1935</b>             |
| [( $\text{pz}_2\text{TTP}'$ ) $\text{Re}(\text{CO})_3]^+$                            | 0     | 1965.05             | 2205.11 | 1978.42             | 2063.51 | 2083.50             | 1650.83 | 2009                    |
|                                                                                      |       | <b>1915.92</b>      |         | <b>1928.95</b>      |         | <b>2031.41</b>      |         | <b>1959</b>             |
| [( $\text{pz}_2\text{TTP}'$ ) $\text{Re}(\text{CO})_3]^{2+}$                         | $1/2$ | 2044.51             | 1111.60 | 2056.84             | 1220.43 | 2112.18             | 2808.15 | 2071                    |
|                                                                                      |       | <b>1993.40</b>      |         | <b>2005.42</b>      |         | <b>2059.38</b>      |         | <b>2019</b>             |
| [( $\text{pz}_2\text{TTP}'$ ) $\text{Re}(\text{CO})_2(\text{CH}_3\text{CN})]^0$      | $1/2$ | 1883.54             | 2291.85 | 1964.84             | 2121.77 | 2348.39             | 62.25   | 1924                    |
|                                                                                      |       | <b>1836.45</b>      |         | <b>1915.71</b>      |         | <b>2289.68</b>      |         | <b>1876</b>             |
| [( $\text{pz}_2\text{TTP}'$ ) $\text{Re}(\text{CO})_2(\text{CH}_3\text{CN})]^+$      | 0     | 1912.49             | 2453.70 | 1990.99             | 1907.45 | 2360.95             | 6.50    | 1952                    |
|                                                                                      |       | <b>1864.68</b>      |         | <b>1941.22</b>      |         | <b>2421.49</b>      |         | <b>1903</b>             |
| [( $\text{pz}_2\text{TTP}'$ ) $\text{Re}(\text{CO})_2(\text{CH}_3\text{CN})]^{2+}$   | $1/2$ | 1981.11             | 1743.47 | 2076.37             | 1734.10 | 2360.78             | 208.18  | 2029                    |
|                                                                                      |       | <b>1931.58</b>      |         | <b>2024.46</b>      |         | <b>2301.76</b>      |         | <b>1978</b>             |

$\text{pz}_2\text{TTP}'$  = ligand with tolyl methyls replaced by H's

Bold values are with an empirical correction factor for metal complexes:  $\bar{\nu}_{\text{corr}} = 0.975 * \bar{\nu}_{\text{raw}}$

### Calculated Redox potentials.

The thermodynamic data in Table S3 were used to estimate redox potentials that are found in Table 3 of the main text. Briefly, for the reduction of a species according to Equations S-1 and S-2, the electrochemical potential of the reaction is calculated from the difference in

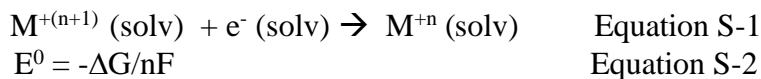

free energies (627.5295 kcal·mol<sup>-1</sup>/Hartree) of the solvated complexes divided by -F (since n = 1 mol e<sup>-</sup>, F = -23.06125 kcal·mol<sup>-1</sup>/eV or by converting ΔG (Hartree) to E (eV) via ΔG\*-27.2114 eV/Hartree), minus the absolute potential of the solvated electron (assigned value of 4.44 V vs SHE).

Thus for **2-Re<sup>n+</sup>**, the energy minimized structures of the dication, monocation, and charge neutral reduced species were calculated in CH<sub>3</sub>CN (PCM). For rhenium, with a ReN<sub>2</sub>P(CO)<sub>3</sub> core, low spin states are calculated (and found) to be lowest energy for each of the three species. So, the reduction potential of the **(2-Re)<sup>+</sup>/(2-Re)<sup>0</sup>** couple is calculated using values (from Table S3):

$$\begin{aligned} E^0(\text{rxn}) &= [(G_{\text{prod}} - G_{\text{react}})/-F] - E^0(\text{e}^{-}_{\text{solv}}) \\ &= (-1944.112241 - -1944.019760 \text{ hartree}) * -27.2114 \text{ eV/Hartree} = 2.516 \text{ eV} \\ &2.516 - 4.44 \text{ eV} = -1.92 \text{ V vs NHE} \end{aligned}$$

Similarly, the **(2-Re)<sup>2+</sup>/(2-Re)<sup>+</sup>** couple is:

$$[(-1944.019760 - -1943.789685 \text{ hartree}) * -27.2114 \text{ eV/Hartree}] - 4.44 \text{ eV} = +1.82 \text{ V vs NHE}$$

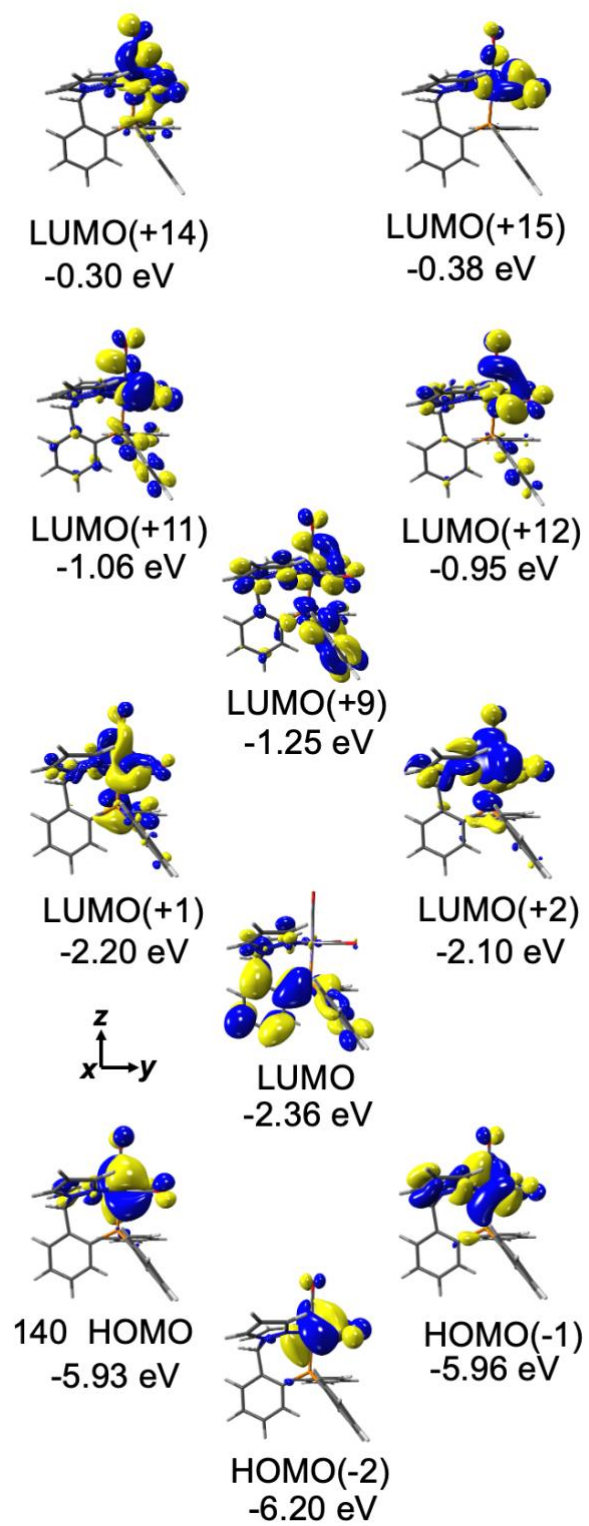

**Figure S18.** Frontier orbitals for 2-Mn.



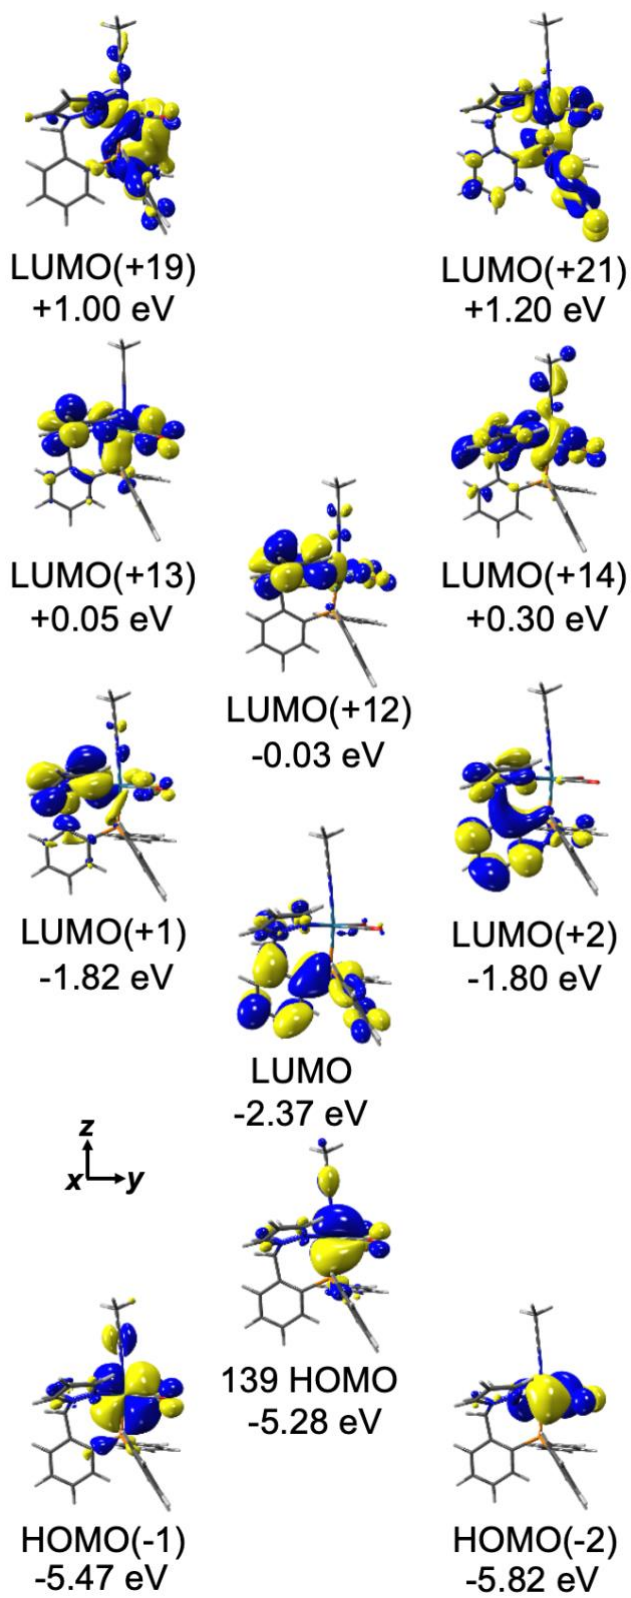

**Figure S19.** Frontier orbitals for 3-Re.

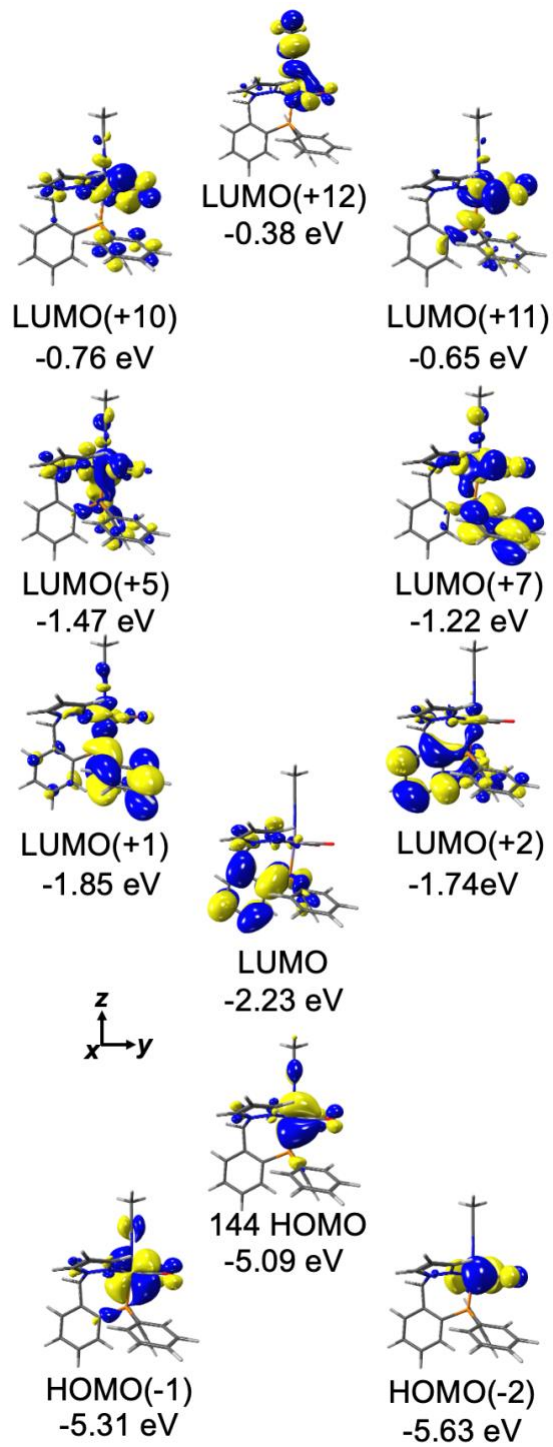

**Figure S20.** Frontier Orbitals for 3-Mn.

**Table S6.** Summary of TD-DFT (M06L/Def2-SV(P)/PCM CH<sub>3</sub>CN) results for **1**,  
E(TD-HF/TD-DFT): -4516.35370235 hartree

| state | eV     | nm         | f      | <S2> | origin <sup>a</sup> |
|-------|--------|------------|--------|------|---------------------|
| 1     | 3.5204 | 352.187251 | 0.0057 | 0    | 153 ->154 0.70462   |
| 2     | 3.6129 | 343.170306 | 0.0045 | 0    | 152 ->154 0.70010   |
| 3     | 3.7789 | 328.095478 | 0.0034 | 0    | 153 ->155 0.69118   |
| 4     | 3.8544 | 321.668742 | 0.0021 | 0    | 152 ->155 0.69121   |
| 5     | 3.9077 | 317.281265 | 0.0066 | 0    | 153 ->156 0.67194   |
| 6     | 3.9556 | 313.439175 | 0.0035 | 0    | 153 ->157 0.63212,  |
|       |        |            |        |      | 152 ->156 0.30290   |
| 7     | 4.0053 | 309.549846 | 0.0055 | 0    | 152 ->156 0.54196,  |
|       |        |            |        |      | 152 ->157 0.35226   |
| 8     | 4.0482 | 306.269453 | 0.004  | 0    | 152 ->157 0.60426   |
| 9     | 4.1016 | 302.282036 | 0.0208 | 0    | 151 ->154 0.68063   |
| 10    | 4.1592 | 298.095788 | 0.0021 | 0    | 153 ->158 0.69337   |
| 11    | 4.2253 | 293.432419 | 0.0018 | 0    | 153 ->159 0.69620   |
| 12    | 4.2783 | 289.797349 | 0.0119 | 0    | 152 ->158 0.62519   |
| 13    | 4.3112 | 287.585823 | 0.0026 | 0    | 152 ->159 0.63595   |
| 14    | 4.3148 | 287.345879 | 0.0031 | 0    | 150 ->154 0.56852   |
| 15    | 4.389  | 282.488038 | 0.0323 | 0    | 151 ->155 0.54598   |
| 16    | 4.4501 | 278.609469 | 0.0021 | 0    | 149 ->154 0.56037,  |
|       |        |            |        |      | 151 ->156 0.39986   |
| 17    | 4.4705 | 277.338105 | 0.0075 | 0    | 151 ->156 0.51080,  |
|       |        |            |        |      | 149 ->154 -0.32929  |
| 18    | 4.4992 | 275.56899  | 0.0139 | 0    | 153 ->160 0.47679,  |
|       |        |            |        |      | 151 ->157 0.31433   |
| 19    | 4.5068 | 275.104287 | 0.0044 | 0    | 153 ->161 0.51379,  |
|       |        |            |        |      | 153 ->160 -0.39830  |
| 20    | 4.5174 | 274.458759 | 0.0012 | 0    | 148 ->154 0.58210   |
| 21    | 4.5391 | 273.146659 | 0.0107 | 0    | 151 ->157 0.43454,  |
|       |        |            |        |      | 148 ->154 0.30107   |
| 22    | 4.5649 | 271.602883 | 0.0022 | 0    | 152 ->160 0.54925,  |
|       |        |            |        |      | 147 ->154 -0.39681  |
| 23    | 4.5725 | 271.151449 | 0.0078 | 0    | 147 ->154 0.44896,  |
|       |        |            |        |      | 152 ->160 0.38550   |
| 24    | 4.5926 | 269.964726 | 0.0048 | 0    | 152 ->161 0.52762,  |
|       |        |            |        |      | 153 ->162 -0.40452  |
| 25    | 4.6109 | 268.893275 | 0.0056 | 0    | 150 ->155 0.57919   |

(a) Only transitions with intensity > 0.3 are reported; HOMO = orbital 153

**Table S7.** Summary of TD-DFT (M06L/Def2-SV(P)/PCM CH<sub>3</sub>CN) results for **2-Re**,

E(TD-HF/TD-DFT): -1942.4047 hartree

| state | eV     | nm         | f      | <S2> | origin <sup>a</sup>                                            |
|-------|--------|------------|--------|------|----------------------------------------------------------------|
| 1     | 3.8572 | 321.435238 | 0.0069 | 0    | 135 ->136 0.70219                                              |
| 2     | 3.8895 | 318.765908 | 0.0043 | 0    | 134 ->136 0.69971                                              |
| 3     | 4.1754 | 296.939215 | 0.002  | 0    | 133 ->136 0.67836                                              |
| 4     | 4.2021 | 295.052474 | 0.0157 | 0    | 135 ->137 0.61069                                              |
| 5     | 4.2425 | 292.242781 | 0.0065 | 0    | 132 ->136 0.67628                                              |
| 6     | 4.256  | 291.315789 | 0.015  | 0    | 134 ->137 0.65570                                              |
| 7     | 4.3059 | 287.939804 | 0.0115 | 0    | 135 ->138 0.63401                                              |
| 8     | 4.3918 | 282.307938 | 0.0656 | 0    | 134 ->138 0.53904                                              |
| 9     | 4.4187 | 280.589314 | 0.0139 | 0    | 135 ->139 0.56110                                              |
| 10    | 4.4267 | 280.082228 | 0.0055 | 0    | 134 ->139 0.62564                                              |
| 11    | 4.447  | 278.803688 | 0.0026 | 0    | 131 ->136 0.63720                                              |
| 12    | 4.5139 | 274.67157  | 0.0075 | 0    | 134 ->140 0.46340,<br>133 ->137 0.37283,<br>134 ->140 0.40082, |
| 13    | 4.5306 | 273.659118 | 0.0032 | 0    | 135 ->140 -0.38769<br>130 ->136 0.41703,                       |
| 14    | 4.5356 | 273.357439 | 0.0348 | 0    | 133 ->137 0.30985<br>130 ->136 0.36488,                        |
| 15    | 4.541  | 273.032372 | 0.002  | 0    | 133 ->137 -0.33254                                             |
| 16    | 4.5873 | 270.276633 | 0.0202 | 0    | 132 ->137 0.55414<br>129 ->136 0.46667,                        |
| 17    | 4.5981 | 269.641809 | 0.0132 | 0    | 133 ->138 0.32605                                              |
| 18    | 4.6356 | 267.460523 | 0.0416 | 0    | 133 ->138 0.52400                                              |
| 19    | 4.6769 | 265.098676 | 0.0025 | 0    | 132 ->138 0.61197                                              |
| 20    | 4.7042 | 263.560223 | 0.0054 | 0    | 133 ->139 0.55580                                              |
| 21    | 4.7147 | 262.973254 | 0.0008 | 0    | 134 ->141 0.50418                                              |
| 22    | 4.7305 | 262.094916 | 0.0047 | 0    | 135 ->141 0.49890                                              |
| 23    | 4.7668 | 260.099018 | 0.0139 | 0    | 131 ->137 0.61905                                              |
| 24    | 4.7797 | 259.397033 | 0.0018 | 0    | 132 ->139 0.62224                                              |
| 25    | 4.8058 | 257.988264 | 0.0067 | 0    | 130 ->137 0.55380                                              |

(b) Only transitions with intensity &gt; 0.3 are reported; HOMO = orbital 135

**Table S8.** Summary of TD-DFT (M06L/Def2-SV(P)/PCM CH<sub>3</sub>CN) results for **2-Mn**,

E(TD-HF/TD-DFT): -3014.85311724

|    | eV <sup>a</sup> | nm         | f      | <S2> | Origin <sup>b</sup>  |
|----|-----------------|------------|--------|------|----------------------|
|    |                 |            |        |      | 140 ->142 0.45652,   |
|    |                 |            |        |      | 140 ->141 0.39582,   |
| 1  | 3.5143875       | 352.789782 | 0.0051 | 0    | 139 ->143 0.32301    |
|    |                 |            |        |      | 140 ->141 0.58025,   |
| 2  | 3.537495        | 350.485301 | 0.0021 | 0    | 140 ->142 -0.34453   |
| 3  | 3.55836         | 348.430176 | 0.003  | 0    | 139 ->141 0.70258    |
| 4  | 3.7195275       | 333.332661 | 0.0302 | 0    | 139 ->142 0.59550    |
|    |                 |            |        |      | 140 ->143 0.36882,   |
|    |                 |            |        |      | 140 ->142 -0.31518,  |
| 5  | 3.8025975       | 326.050811 | 0.0247 | 0    | 139 ->143 0.30143    |
| 6  | 3.80757         | 325.625005 | 0.0017 | 0    | 138 ->141 0.68265    |
| 7  | 3.84696         | 322.290848 | 0.018  | 0    | 140 ->143 0.49018    |
|    |                 |            |        |      | 138 ->142 0.43112,   |
| 8  | 3.93939         | 314.72893  | 0.0049 | 0    | 138 ->143 -0.35922   |
|    |                 |            |        |      | 140 ->144 0.43888,   |
|    |                 |            |        |      | 138 ->143 -0.37847,  |
| 9  | 4.0250925       | 308.027704 | 0.0083 | 0    | 138 ->142 -0.30572   |
|    |                 |            |        |      | 140 ->144 0.53866,   |
| 10 | 4.0484925       | 306.247325 | 0.0009 | 0    | 138 ->143 0.31569    |
| 11 | 4.127565        | 300.380491 | 0.0027 | 0    | 139 ->144 0.68117    |
|    |                 |            |        |      | 137 ->141 0.59976,   |
| 12 | 4.1227875       | 300.728573 | 0.0065 | 0    | 140 ->145 -0.32188   |
|    |                 |            |        |      | 140 ->145 0.58440,   |
| 13 | 4.127565        | 300.380491 | 0.0044 | 0    | 137 ->141 0.34986    |
| 14 | 4.1855775       | 296.217189 | 0.0075 | 0    | 139 ->145 0.62207    |
|    |                 |            |        |      | 140 ->146 0.51428,   |
| 15 | 4.2031275       | 294.980345 | 0.0037 | 0    | 139 ->146 0.35036    |
|    |                 |            |        |      | 139 ->146 0.46570,   |
| 16 | 4.237935        | 292.557578 | 0.0327 | 0    | 137 ->142 -0.37421   |
| 17 | 4.30872         | 287.751351 | 0.0071 | 0    | 137 ->143 0.58676    |
| 18 | 4.316715        | 287.218406 | 0.0008 | 0    | 138 ->144 0.65265    |
|    |                 |            |        |      | 137 ->142 0.44880,   |
| 19 | 4.3372875       | 285.856079 | 0.0331 | 0    | 140 ->146 -0.30633   |
| 20 | 4.35279         | 284.838    | 0.0086 | 0    | 140 ->147 0.53628    |
|    |                 |            |        |      | 136 ->141 0.56601,   |
| 21 | 4.3718025       | 283.599271 | 0.0033 | 0    | 135 ->141 -0.38029   |
| 22 | 4.406025        | 281.396497 | 0.0126 | 0    | 139 ->147 0.53400,   |
|    |                 |            |        |      | 140 ->148 0.43655,   |
| 23 | 4.41987         | 280.515038 | 0.0034 | 0    | 138 ->145 0.38962    |
| 24 | 4.4529225       | 278.432872 | 0.0078 | 0    | 135 ->141 0.43628    |
|    |                 |            |        |      | 140 ->148 0.35580, 1 |
|    |                 |            |        |      | 38 ->146 -0.32781,   |
| 25 | 4.4538975       | 278.37192  | 0.0155 | 0    | 138 ->145 -0.32036   |

(a) An empirical scaling factor of 0.975 has been applied.

(b) Only transitions with intensity &gt; 0.3 are reported; HOMO = orbital 140;

**Table S9.** Summary of TD-DFT (M06L/Def2-SV(P)/PCM CH<sub>3</sub>CN) results for **3-Re**,

| E(TD-HF/TD-DFT): |        | -1961.8327 hartree |        |      |           |          |
|------------------|--------|--------------------|--------|------|-----------|----------|
|                  | eV     | nm                 | f      | <S2> | origin    |          |
| 1                | 3.1563 | 392.814371         | 0.0055 | 0    | 139 ->140 | 0.70495  |
| 2                | 3.344  | 370.76555          | 0.0045 | 0    | 138 ->140 | 0.70403  |
| 3                | 3.6327 | 341.29986          | 0.0163 | 0    | 139 ->142 | 0.61873  |
| 4                | 3.6545 | 339.263921         | 0.0244 | 0    | 139 ->141 | 0.60404  |
| 5                | 3.7196 | 333.326164         | 0.0045 | 0    | 137 ->140 | 0.69431  |
| 6                | 3.8167 | 324.846071         | 0.0131 | 0    | 138 ->142 | 0.57468, |
|                  |        |                    |        |      | 139 ->143 | -0.31433 |
| 7                | 3.8228 | 324.327718         | 0.0309 | 0    | 139 ->143 | 0.58825  |
|                  |        |                    |        |      | 138 ->141 | 0.53825, |
| 8                | 3.8632 | 320.936012         | 0.0426 | 0    | 139 ->144 | 0.31559  |
| 9                | 3.9121 | 316.924414         | 0.0167 | 0    | 139 ->144 | 0.58783  |
| 10               | 3.982  | 311.361125         | 0.0054 | 0    | 138 ->143 | 0.69113  |
| 11               | 4.1116 | 301.546843         | 0.0345 | 0    | 138 ->144 | 0.65589  |
| 12               | 4.1352 | 299.825885         | 0.0067 | 0    | 139 ->145 | 0.69971  |
|                  |        |                    |        |      | 137 ->141 | 0.58575, |
| 13               | 4.1861 | 296.180215         | 0.0026 | 0    | 139 ->146 | 0.39196  |
| 14               | 4.2018 | 295.07354          | 0.0006 | 0    | 137 ->142 | 0.68262  |
|                  |        |                    |        |      | 139 ->146 | 0.50898, |
| 15               | 4.2712 | 290.279078         | 0.0494 | 0    | 137 ->141 | -0.33619 |
|                  |        |                    |        |      | 138 ->145 | 0.54538, |
| 16               | 4.3252 | 286.654952         | 0.0037 | 0    | 139 ->147 | -0.34647 |
|                  |        |                    |        |      | 139 ->147 | 0.47493, |
|                  |        |                    |        |      | 138 ->145 | 0.37753, |
| 17               | 4.3438 | 285.427506         | 0.0159 | 0    | 136 ->140 | 0.30560  |
|                  |        |                    |        |      | 136 ->140 | 0.59897, |
| 18               | 4.3461 | 285.276455         | 0.021  | 0    | 139 ->147 | -0.30613 |
| 19               | 4.3783 | 283.178403         | 0.0105 | 0    | 137 ->143 | 0.63003  |
| 20               | 4.4215 | 280.411625         | 0.017  | 0    | 138 ->146 | 0.60995  |
| 21               | 4.4431 | 279.048412         | 0.026  | 0    | 139 ->148 | 0.61927  |
| 22               | 4.4652 | 277.667294         | 0.0148 | 0    | 137 ->144 | 0.62052  |
|                  |        |                    |        |      | 135 ->140 | 0.54885, |
| 23               | 4.476  | 276.997319         | 0.0034 | 0    | 134 ->140 | 0.37811  |
| 24               | 4.4922 | 275.998397         | 0.0058 | 0    | 138 ->147 | 0.69202  |
| 25               | 4.576  | 270.944056         | 0.038  | 0    | 134 ->140 | 0.55492  |

(a) Only transitions with intensity &gt; 0.3 are reported; HOMO = orbital 139

**Table S10.** Summary of TD-DFT (M06L/Def2-SV(P)/PCM CH<sub>3</sub>CN) results for **3-Mn**,

| E(TD-HF/TD-DFT): |                 | -3034.28880432 hartree |        |      |                                         |  |
|------------------|-----------------|------------------------|--------|------|-----------------------------------------|--|
|                  | eV <sup>a</sup> | nm                     | f      | <S2> | origin <sup>b</sup>                     |  |
| 1                | 2.80488         | 442.029606             | 0.0042 | 0    | 144 ->145 0.70548                       |  |
| 2                | 3.04317         | 407.417266             | 0.0031 | 0    | 143 ->145 0.69380                       |  |
| 3                | 3.07476         | 403.231472             | 0.0112 | 0    | 144 ->146 0.63050                       |  |
| 4                | 3.2560125       | 380.784779             | 0.0127 | 0    | 144 ->147 0.67318                       |  |
| 5                | 3.28692         | 377.204191             | 0.0056 | 0    | 143 ->146 0.59745                       |  |
| 6                | 3.354975        | 369.552679             | 0.0001 | 0    | 142 ->145 0.70363                       |  |
| 7                | 3.3864675       | 366.116019             | 0.0188 | 0    | 144 ->148 0.68948                       |  |
| 8                | 3.4749975       | 356.788746             | 0.0142 | 0    | 144 ->149 0.60794                       |  |
| 9                | 3.484845        | 355.78053              | 0.0007 | 0    | 143 ->147 0.52216<br>144 ->150 0.48781, |  |
| 10               | 3.5508525       | 349.166855             | 0.012  | 0    | 143 ->147 0.35290                       |  |
| 11               | 3.6387975       | 340.727947             | 0.0205 | 0    | 143 ->148 0.65807                       |  |
| 12               | 3.708705        | 334.305371             | 0.0124 | 0    | 143 ->149 0.61704                       |  |
| 13               | 3.7158225       | 333.665023             | 0.0055 | 0    | 144 ->151 0.59984                       |  |
| 14               | 3.7538475       | 330.285127             | 0.0082 | 0    | 142 ->146 0.55257<br>143 ->150 0.45650, |  |
| 15               | 3.810885        | 325.341751             | 0.006  | 0    | 144 ->152 -0.36227                      |  |
| 16               | 3.8291175       | 323.792623             | 0.007  | 0    | 142 ->147 0.53366<br>142 ->147 0.36760, |  |
| 17               | 3.8704575       | 320.334224             | 0.0083 | 0    | 144 ->152 0.33785                       |  |
| 18               | 3.886155        | 319.040285             | 0.0047 | 0    | 144 ->153 0.60635                       |  |
| 19               | 3.936855        | 314.931589             | 0.0149 | 0    | 142 ->148 0.59471                       |  |
| 20               | 3.97215         | 312.133228             | 0.0081 | 0    | 143 ->151 0.59024                       |  |
| 21               | 3.9917475       | 310.600808             | 0.0098 | 0    | 142 ->149 0.56839<br>144 ->154 0.46904, |  |
| 22               | 4.035525        | 307.231401             | 0.0232 | 0    | 142 ->149 0.30210                       |  |
| 23               | 4.05756         | 305.562949             | 0.014  | 0    | 142 ->150 0.46647                       |  |
| 24               | 4.1138175       | 301.384298             | 0.005  | 0    | 143 ->152 0.48830                       |  |
| 25               | 4.14258         | 299.291746             | 0.019  | 0    | 143 ->153 0.63952                       |  |

(a) An empirical scaling factor of 0.975 has been applied.

(b) Only transitions with intensity &gt; 0.3 are reported; HOMO = orbital 144;

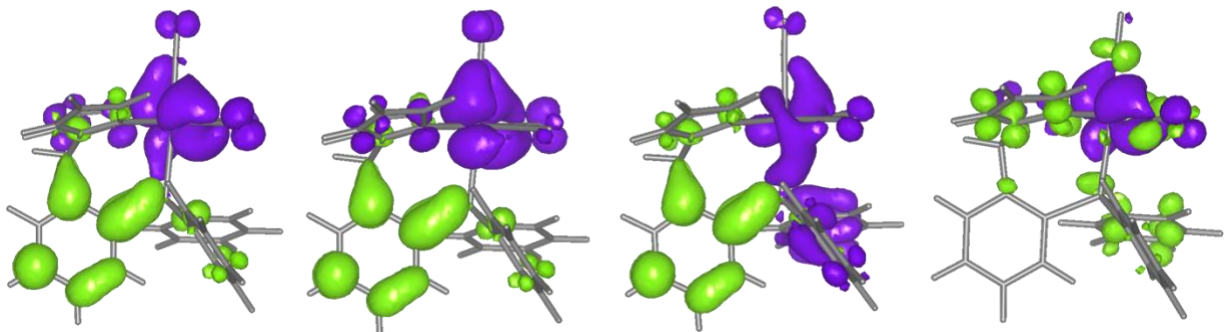

**Figure S21.** Electron density difference maps for first four excitations of **2-Re** using natural transition orbital analyses. Violet is negative (loss) while green is positive density (gain).

|     | 1a      | 1b      | 2-Re    | 2-Mn    | 3-Re    | 3-Mn    |
|-----|---------|---------|---------|---------|---------|---------|
| M   | 0.58579 | 0.56587 | 0.5424  | 0.28062 | 0.66019 | 0.28317 |
| Br  | -0.6143 | -0.6326 |         |         |         |         |
| P   | 0.43326 | 0.47792 | 0.47351 | 0.60423 | 0.48649 | 0.67178 |
| N1  |         |         |         |         | -0.5434 | -0.5356 |
| N12 | -0.4565 | -0.4385 | -0.412  | -0.2107 | -0.4201 | -0.2451 |
| N22 | -0.5951 | -0.5918 | -0.4166 | -0.2376 | -0.4217 | -0.2217 |
| C8  | 0.1797  | 0.17843 | 0.1835  | 0.07901 | 0.12208 | -0.0105 |
| O1  | -0.3337 | -0.3342 | -0.3273 | -0.2848 | -0.3865 | -0.34   |
| C9  | 0.09903 | 0.09606 | 0.15919 | 0.04424 | 0.08486 | 0.032   |
| O2  | -0.3439 | -0.3438 | -0.3247 | -0.2826 | -0.3841 | -0.3382 |
| C10 | 0.19571 | 0.1764  | 0.19099 | 0.24128 |         |         |
| O3  | -0.3045 | -0.3072 | -0.304  | -0.2759 |         |         |

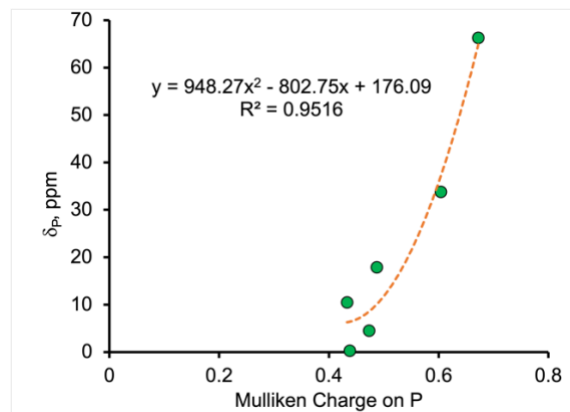

**Figure S22.** Left: Mulliken Charges on select atoms of **1a** (major isomer), **1b** (minor isomer), **2-M** and **3-M** (M = Re, Mn). Right: Plot of  $^{31}\text{P}$  chemical shift versus phosphorous Mulliken charge.
